# Supplementary material for: Synthesis of 4-trifluoromethanesulfonate substituted 3,6-dihydropyrans and their application in various C–C coupling reactions
Source: Royal Society of Chemistry journal article supplement (doi:10.1039/c6ra02343f), 2016-01-01

## Supporting Information

### **Stereoselective Synthesis of 4-Trifluoromethanesulfonate Substituted 3,6-Dihydropyrans and Their Application in Various Coupling Reactions**

Anil Kumar Saikia,\* Priya Ghosh and Ashutosh K. Kautarya

Department of Chemistry, Indian Institute of Technology Guwahati, Assam-781039, India

#### **Contents:**

- |                                                                                                                                                |                |
|------------------------------------------------------------------------------------------------------------------------------------------------|----------------|
| 1. $^1\text{H}$ and $^{13}\text{C}$ NMR spectra of <b>3a-3p</b> , <b>8a-8f</b> , <b>9</b> , <b>10</b> , <b>11</b> ; DEPT and HMQC of <b>3b</b> | <b>S2-S42</b>  |
| 2. The X-ray crystal crystallographic data of <b>3n</b>                                                                                        | <b>S43-S44</b> |

**$^1\text{H}$  NMR and  $^{13}\text{C}$  NMR spectra of compound 3a**

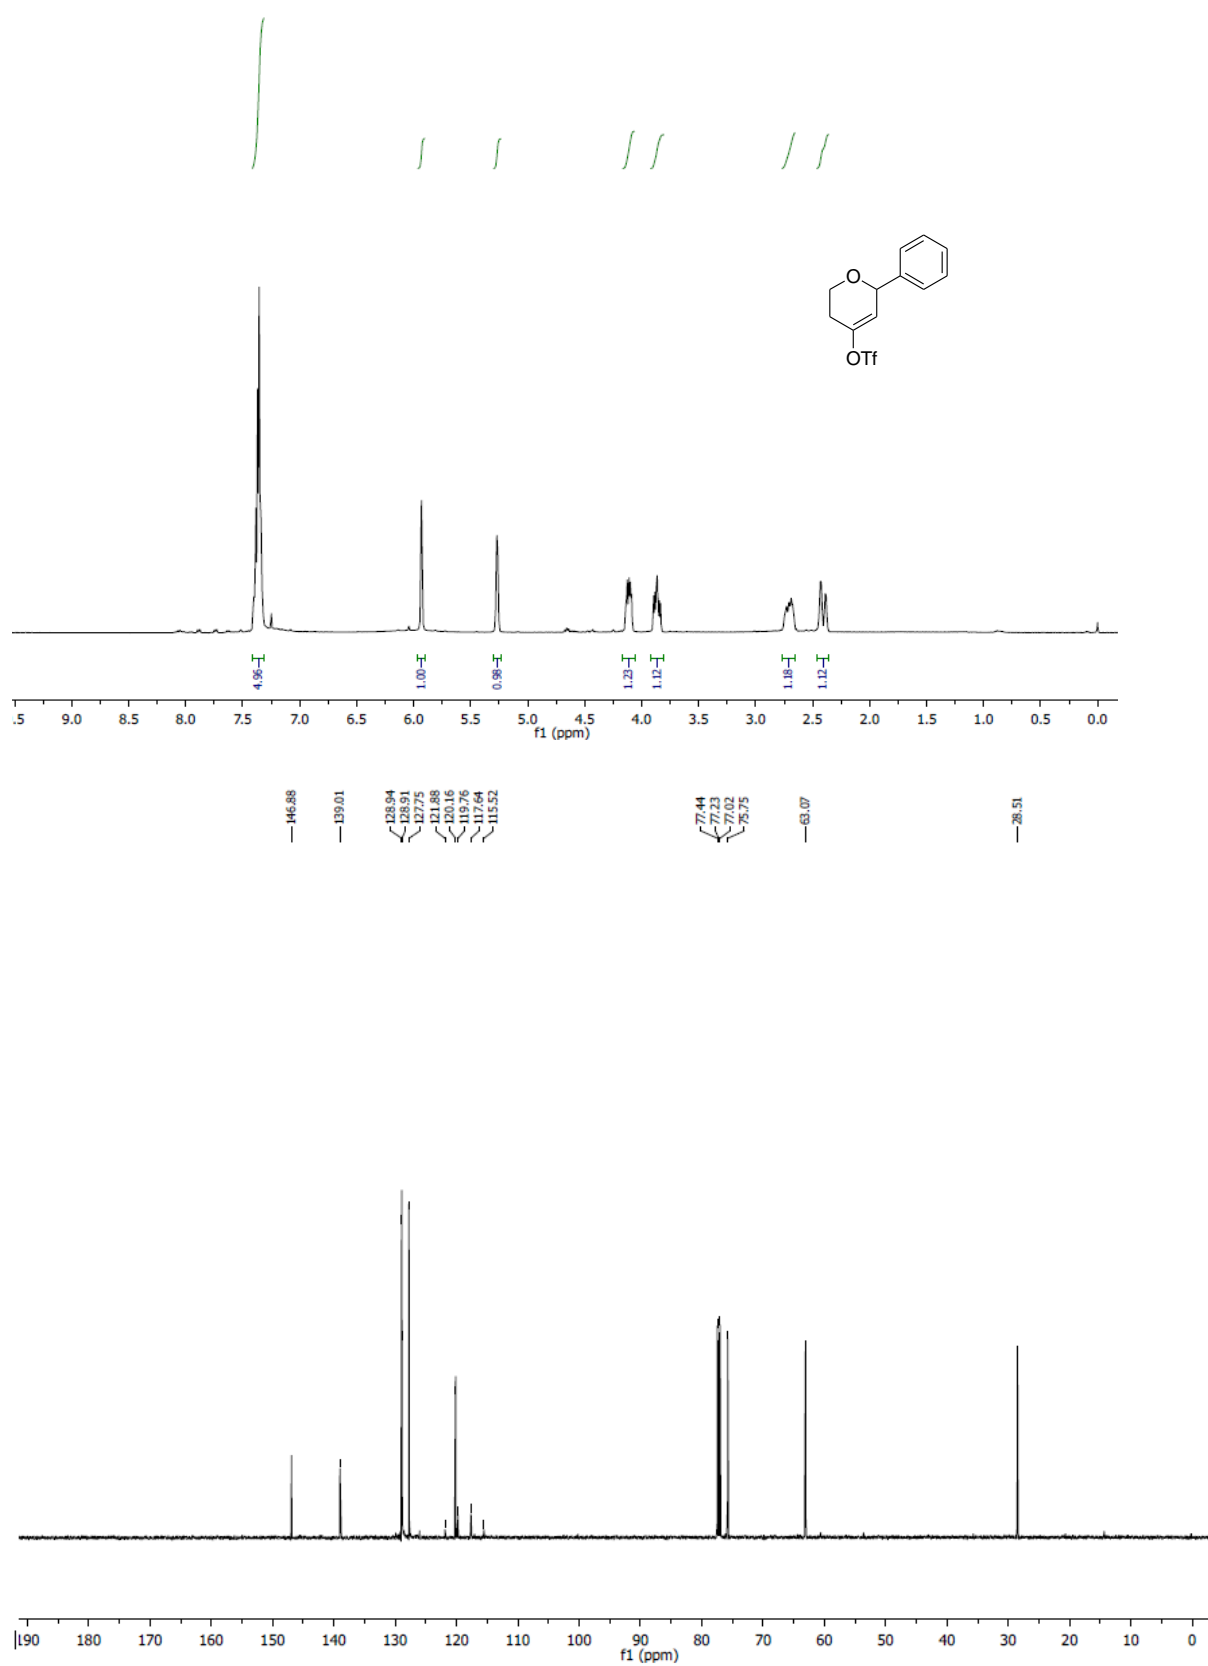

**$^{19}\text{F}$  NMR spectrum of compound 3a**

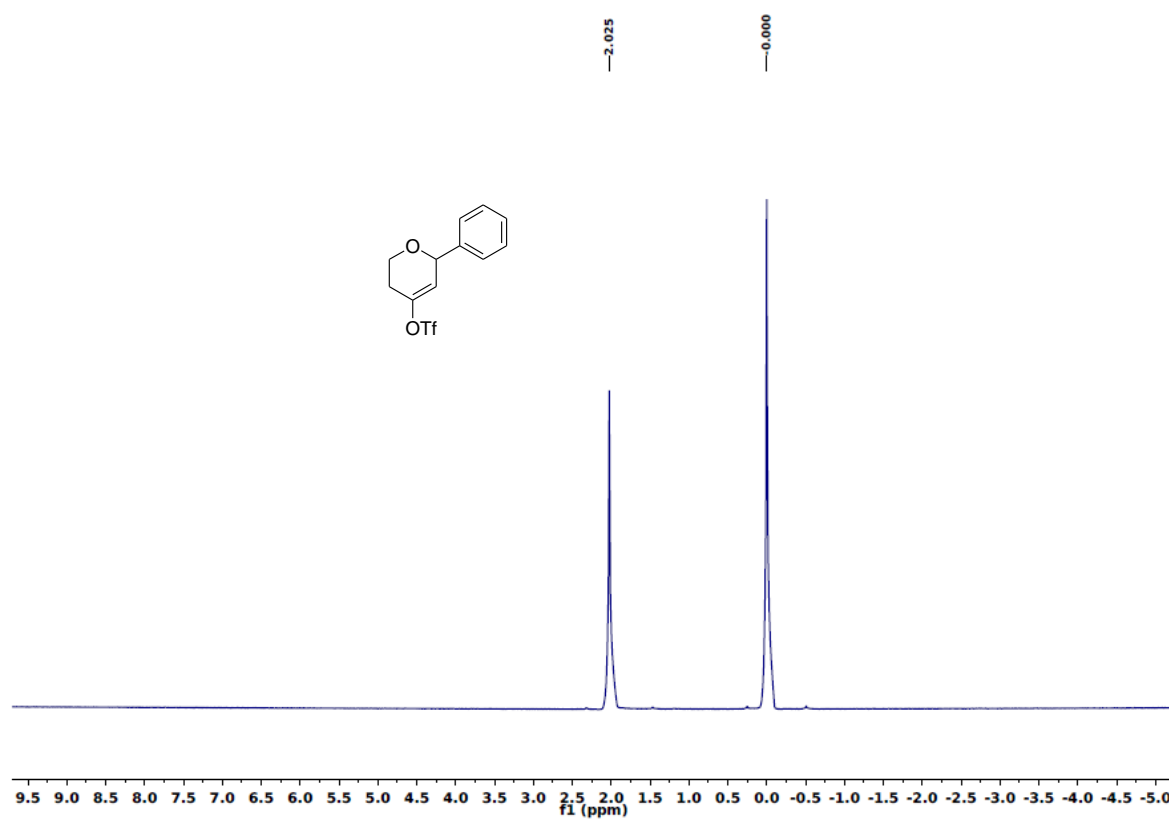

# <sup>1</sup>H NMR and <sup>13</sup>C NMR spectra of compound 3b

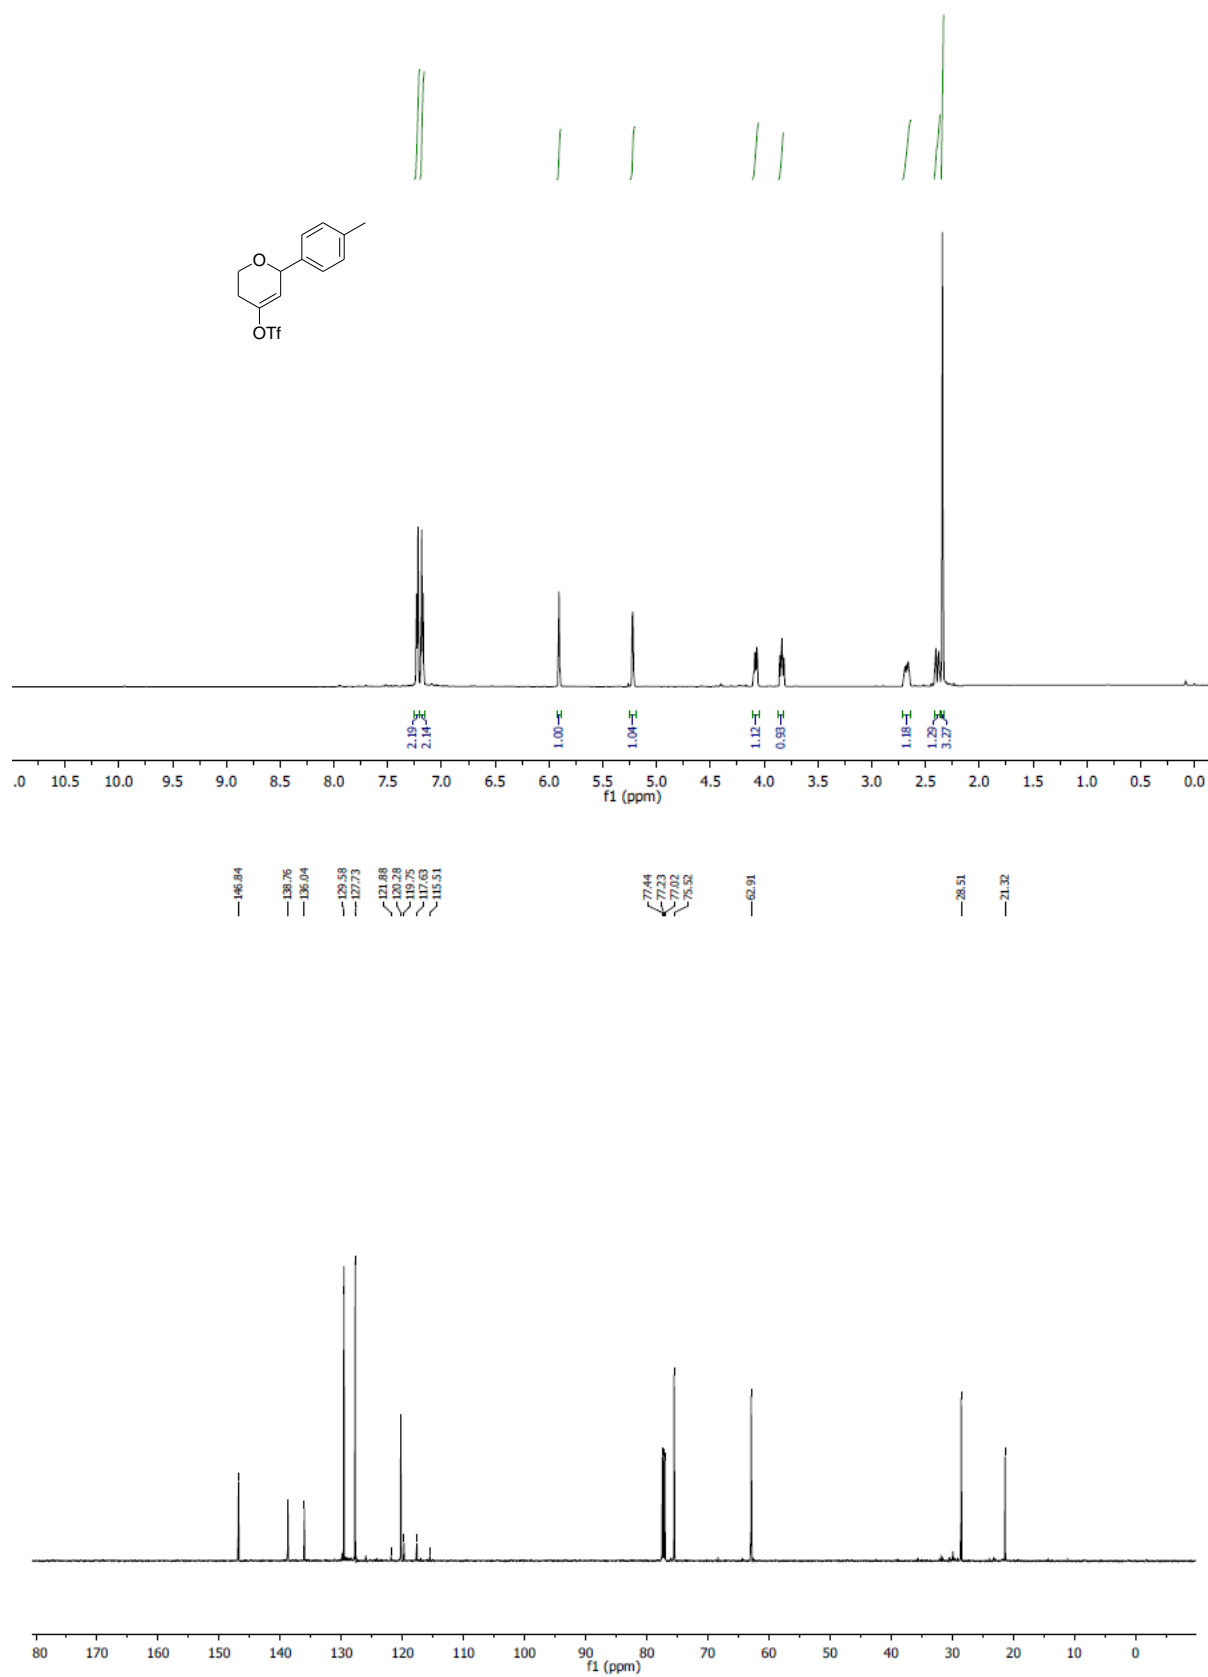

**$^{19}\text{F}$  NMR spectrum of compound 3b**

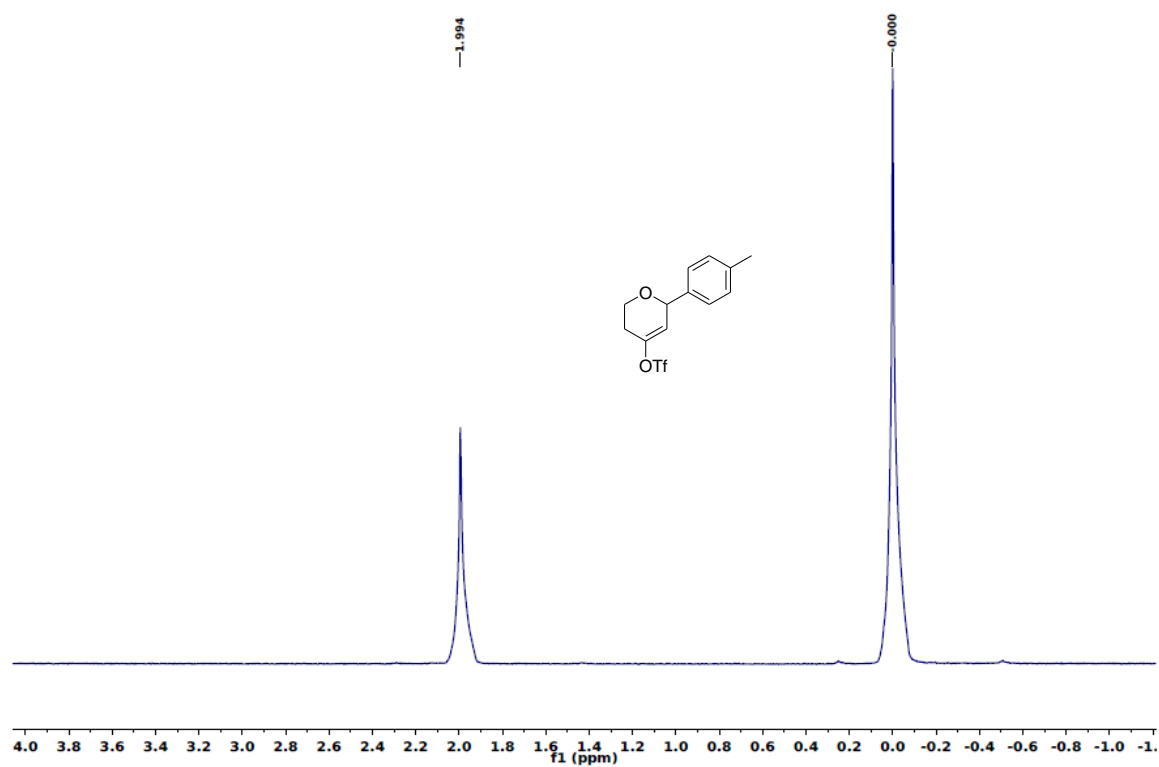

# DEPT and HMQC spectra of compound 3b

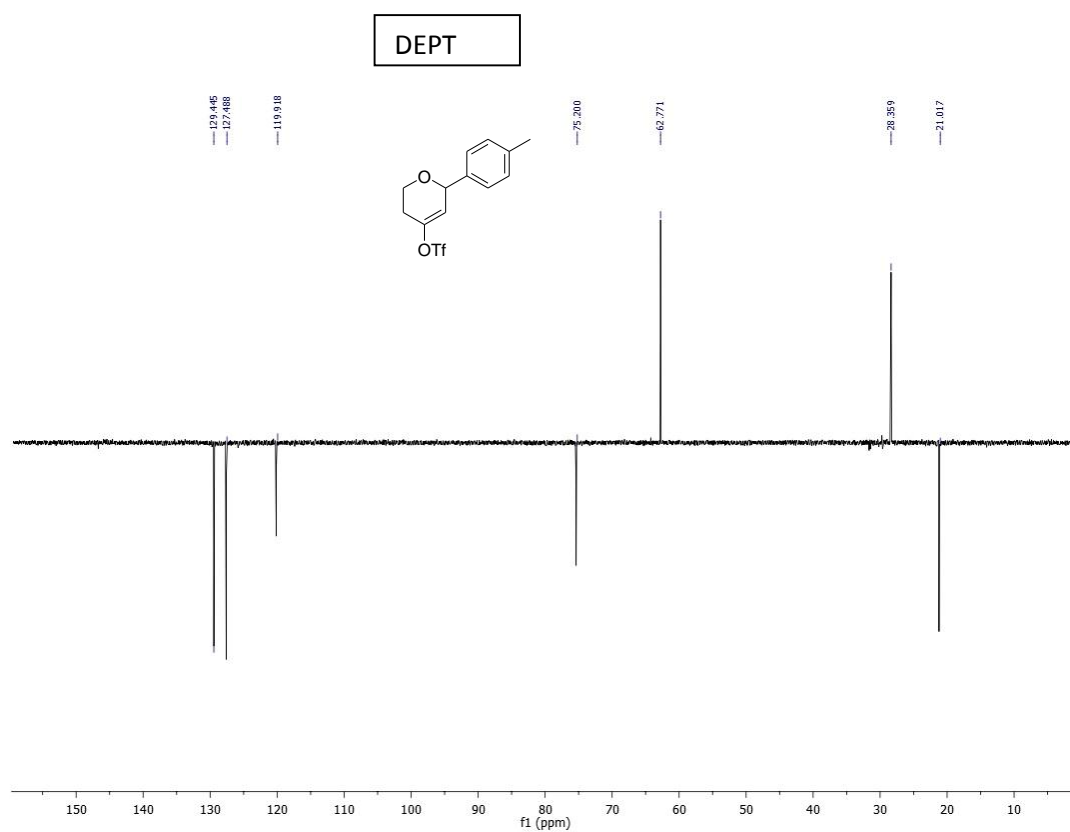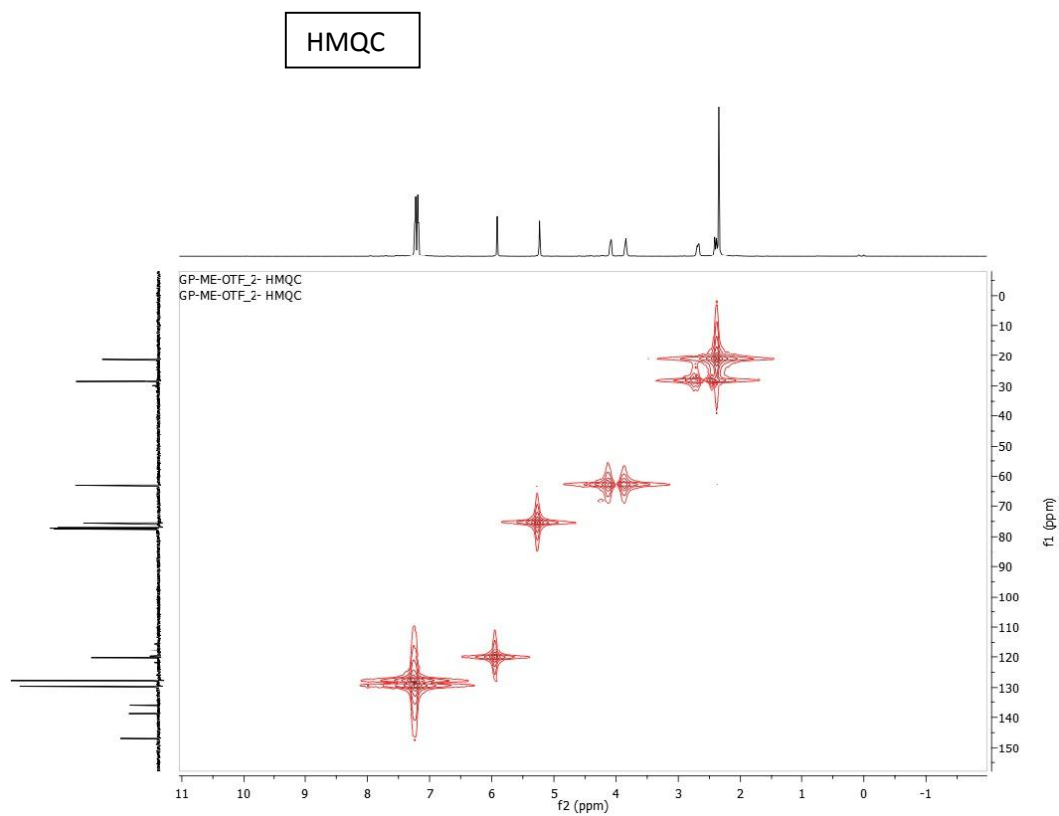

# <sup>1</sup>H NMR and <sup>13</sup>C NMR spectra of compound 3d

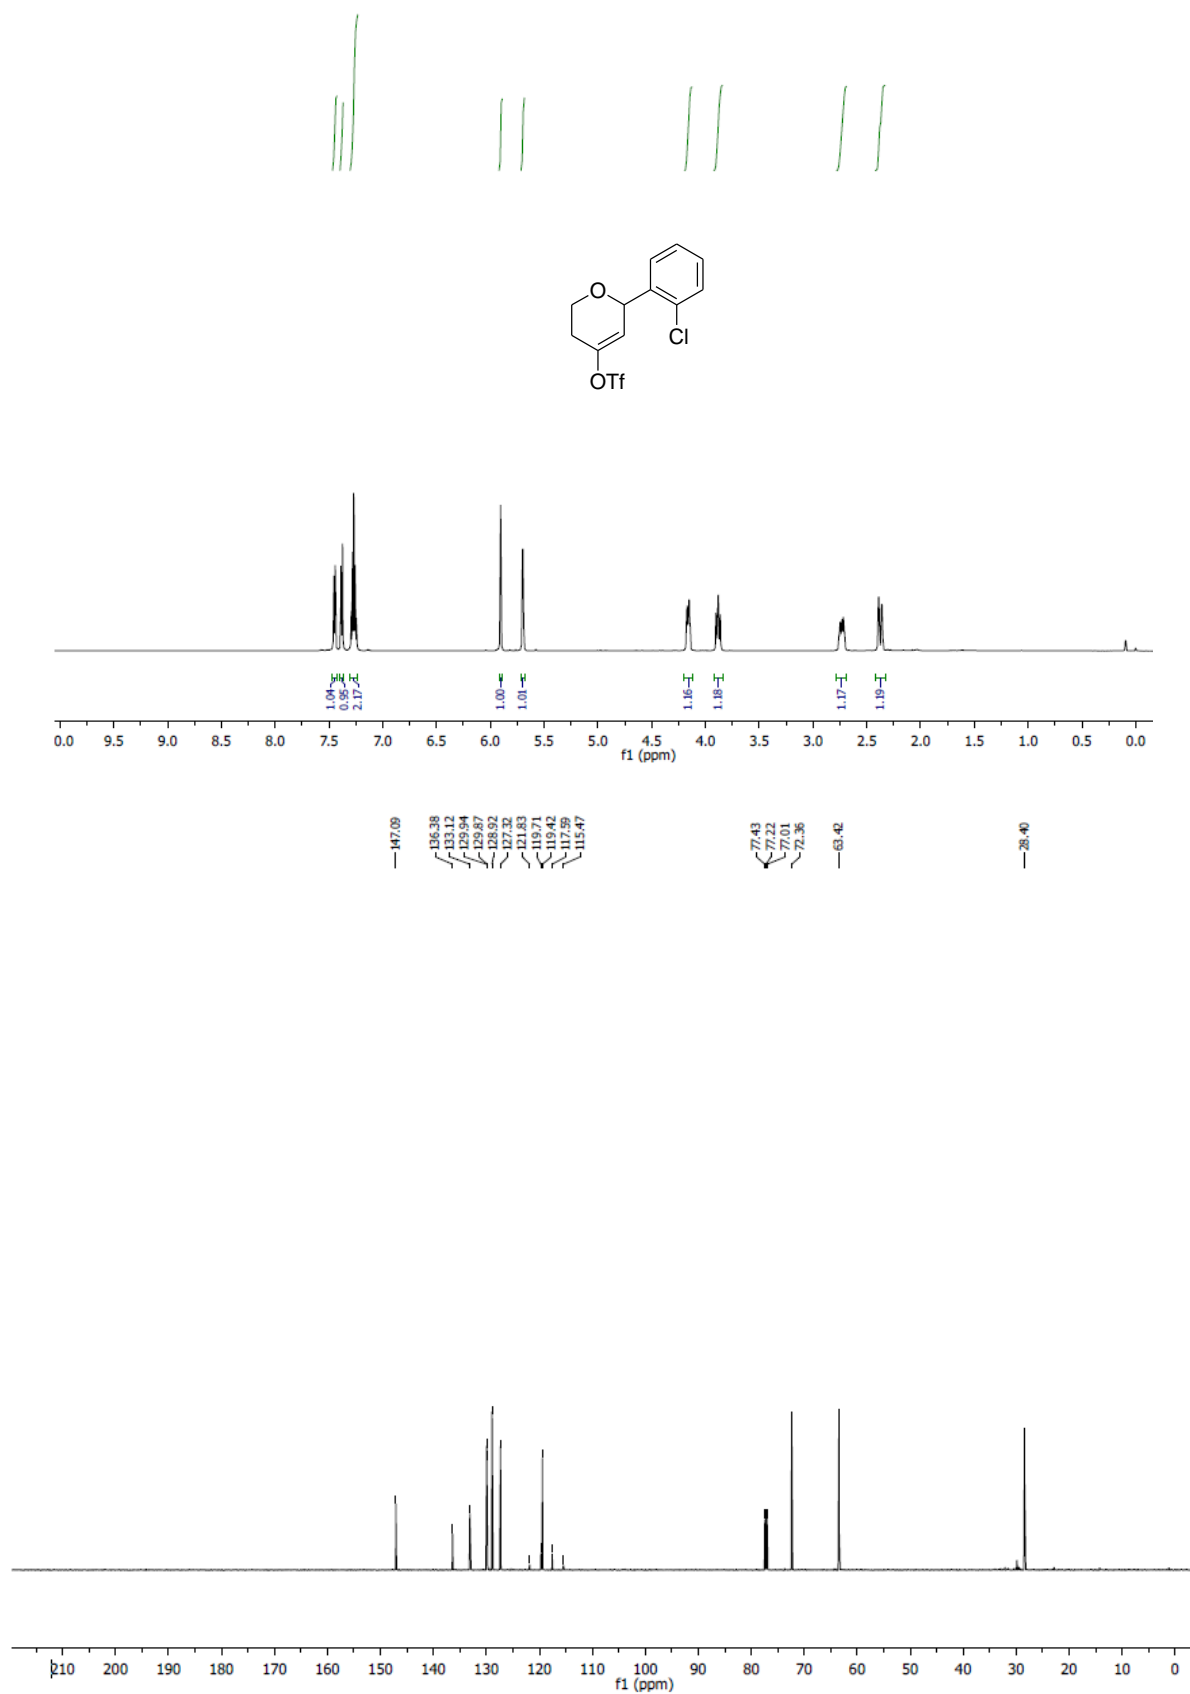

**$^{19}\text{F}$  NMR spectrum of compound 3d**

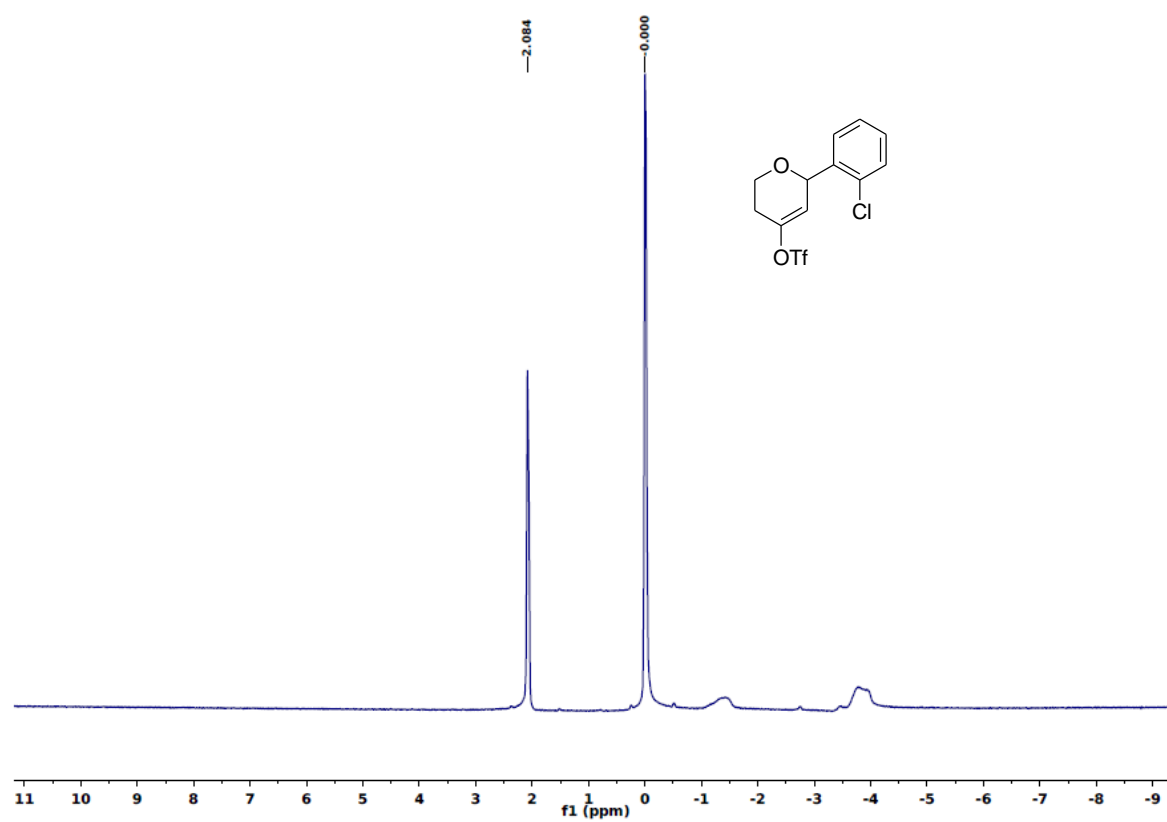



# <sup>1</sup>H NMR and <sup>13</sup>C NMR spectra of compound 3e

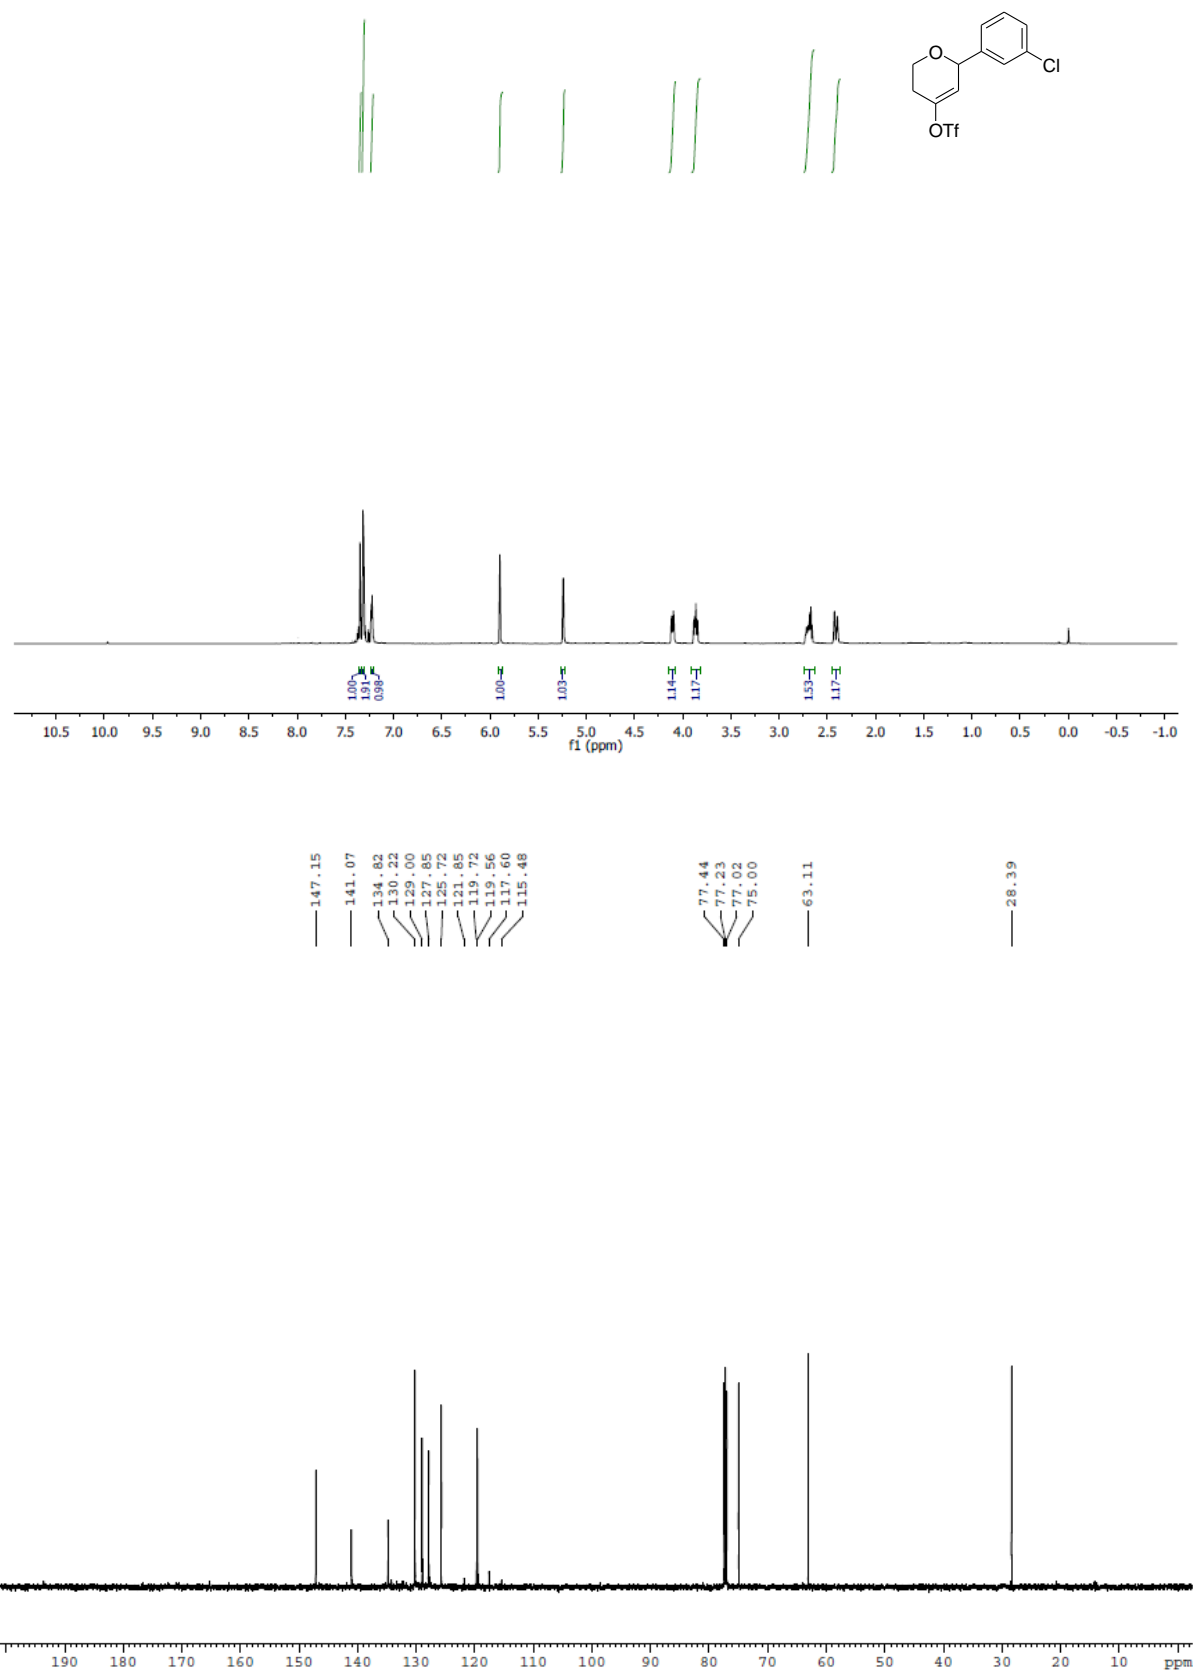

**$^{19}\text{F}$  NMR spectrum of compound 3e**

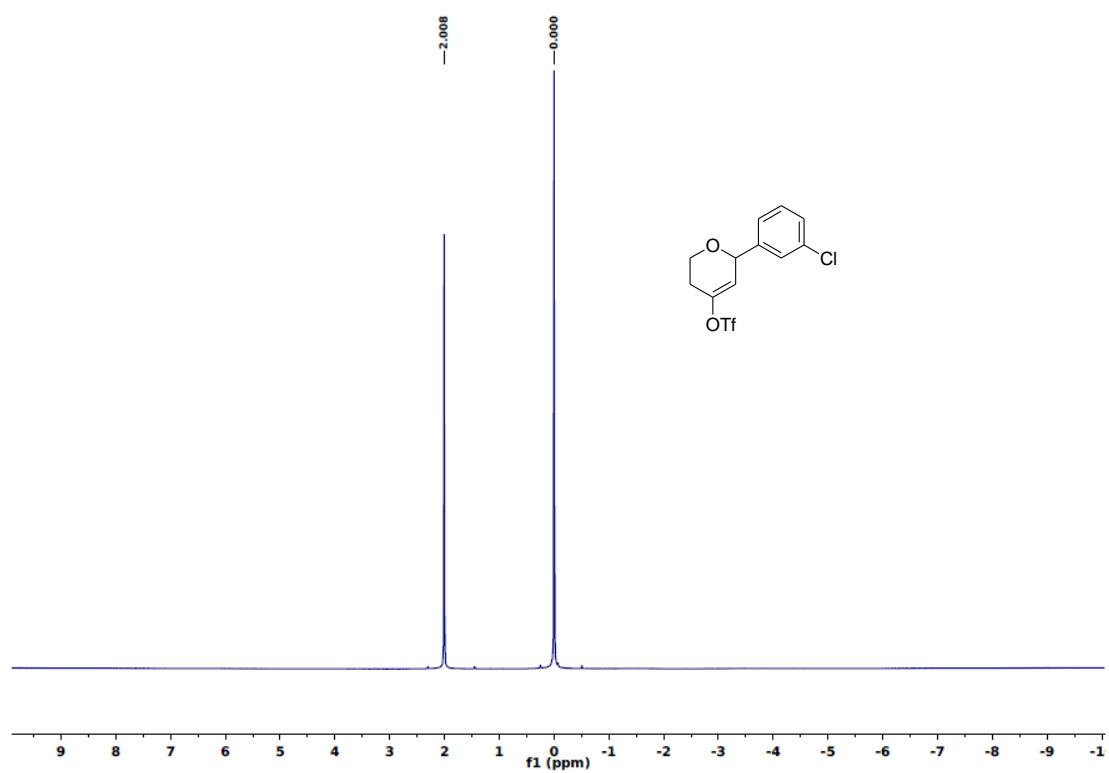

# <sup>1</sup>H NMR and <sup>13</sup>C NMR spectra of compound 3f

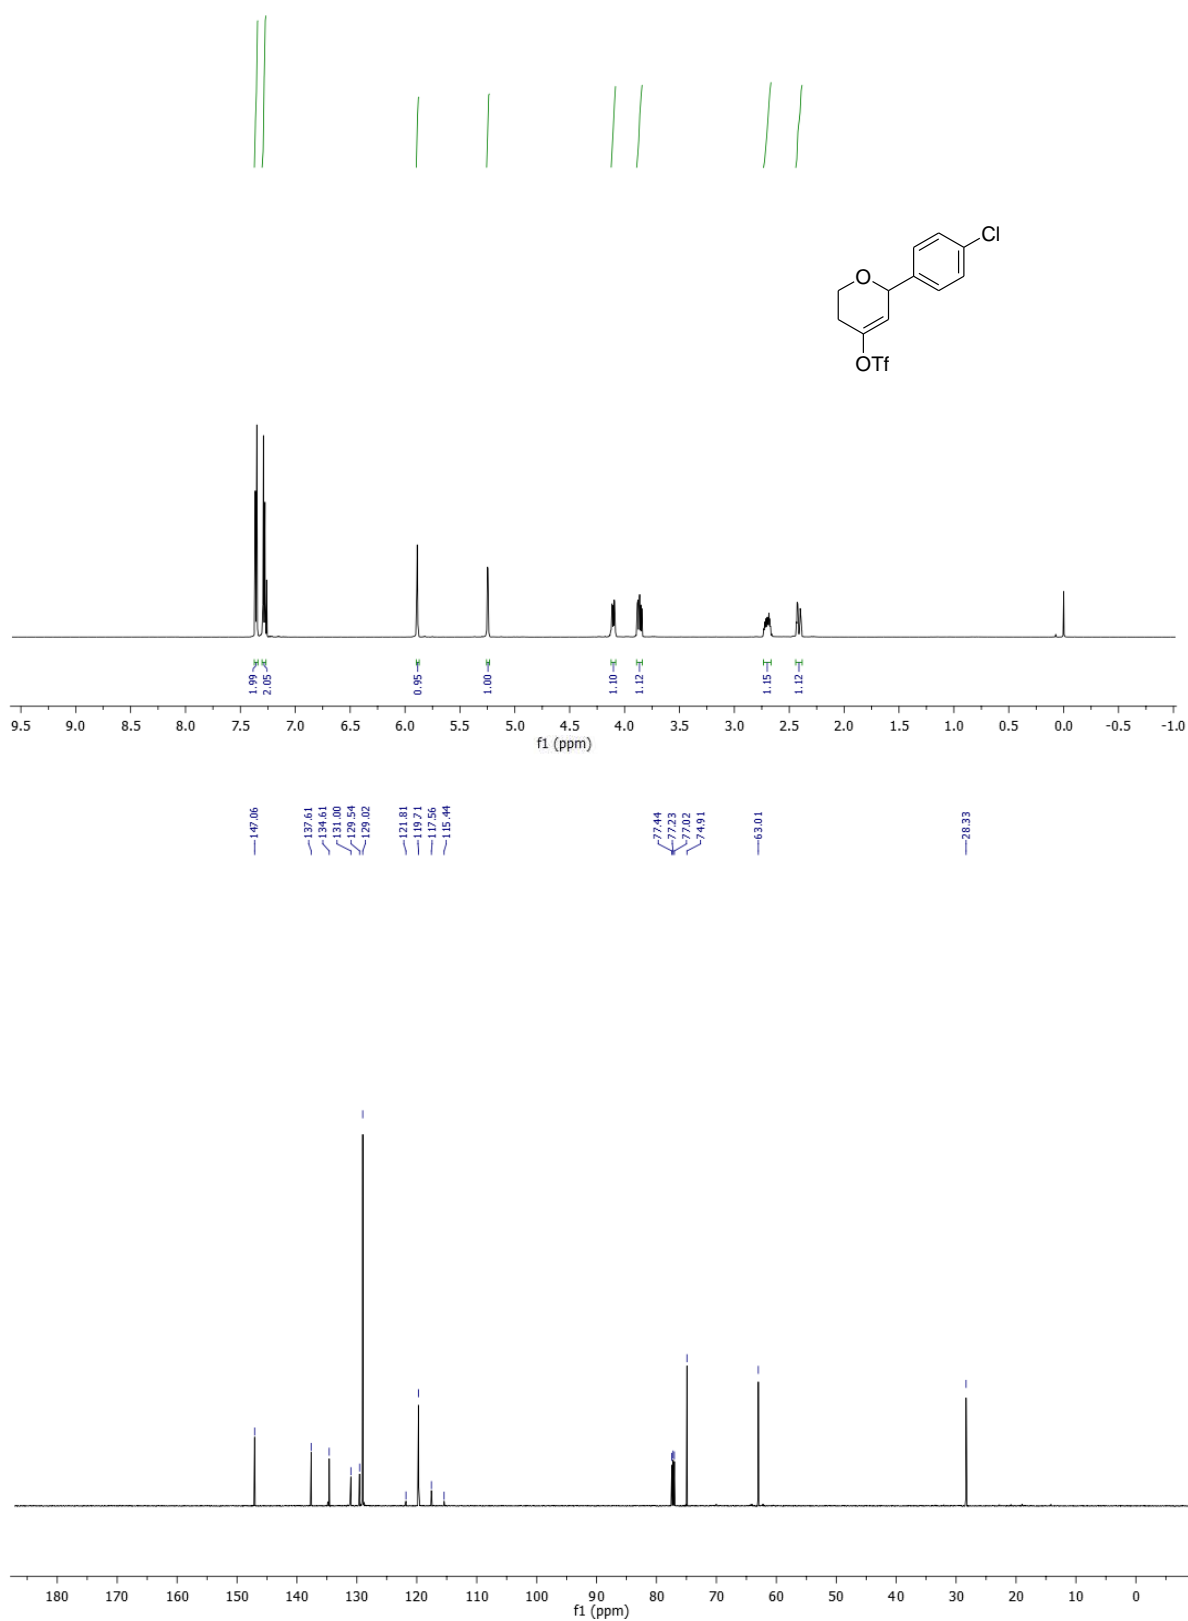

**$^{19}\text{F}$  NMR spectrum of compound 3f**

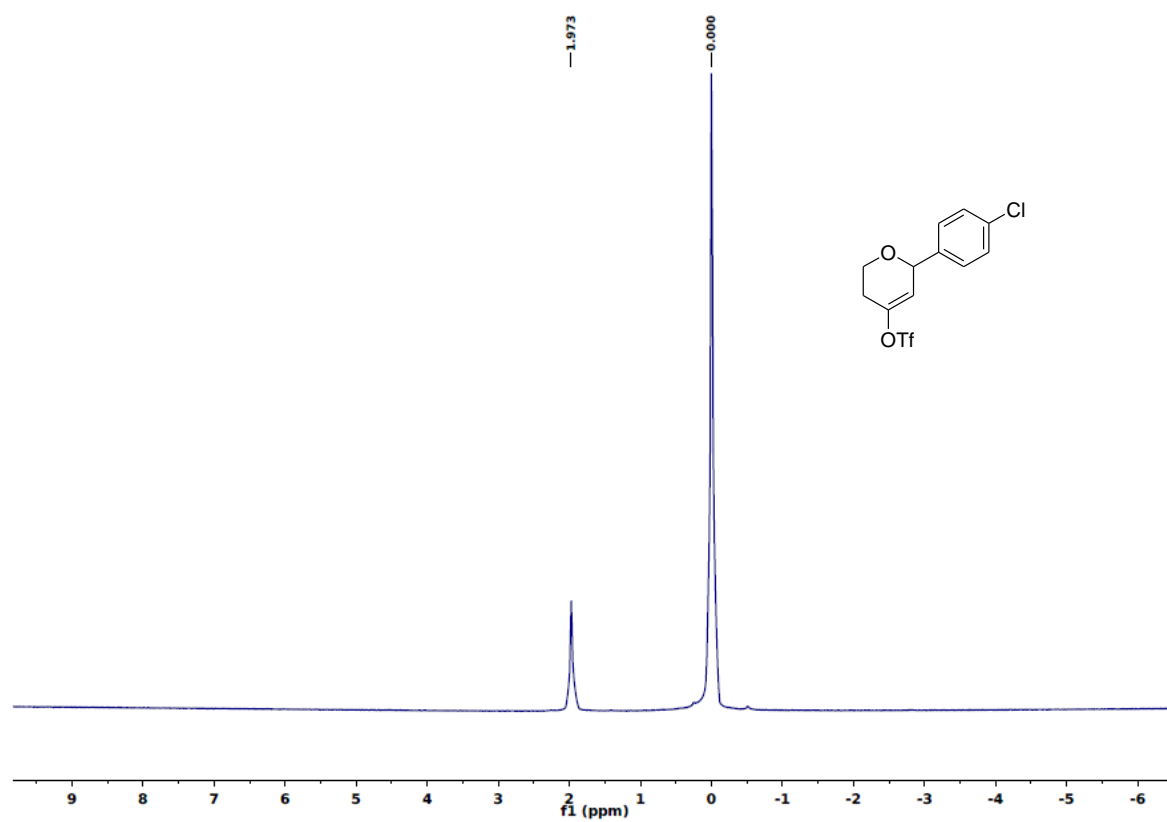

**$^1\text{H}$  NMR and  $^{13}\text{C}$  NMR spectra of compound 3g**

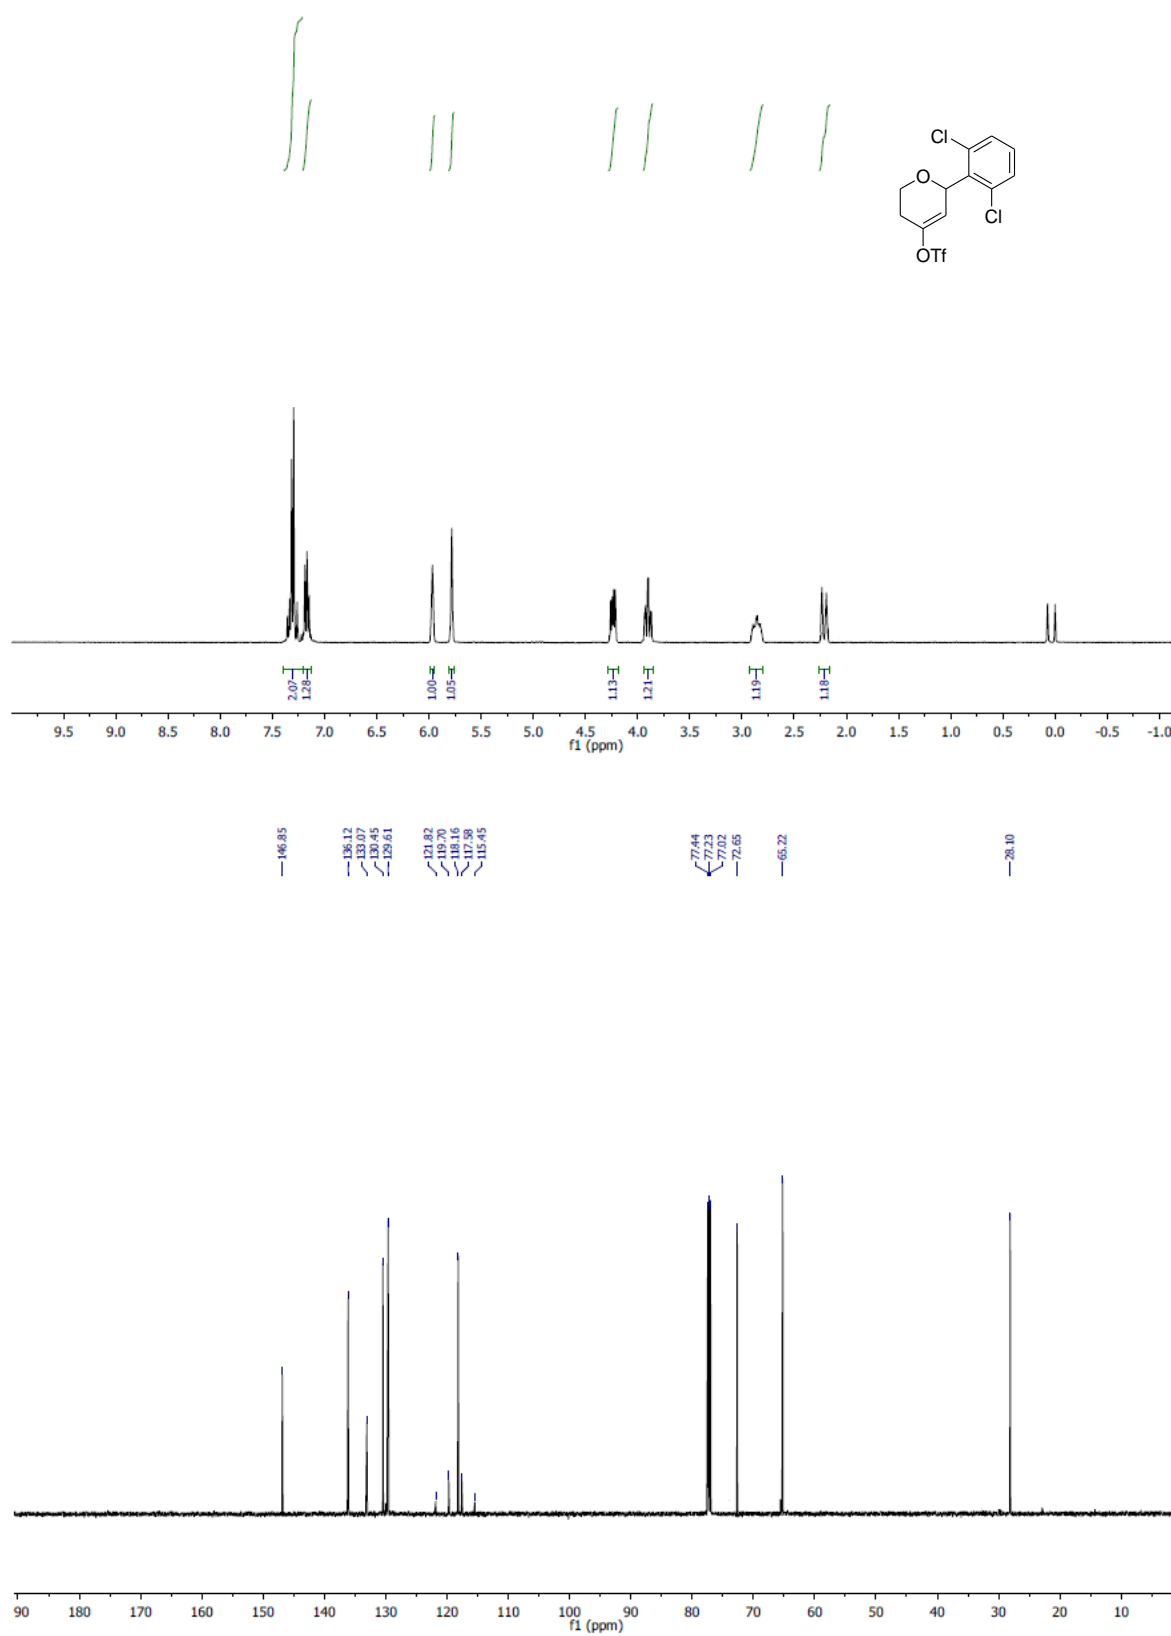

**$^{19}\text{F}$  NMR spectrum of compound 3g**

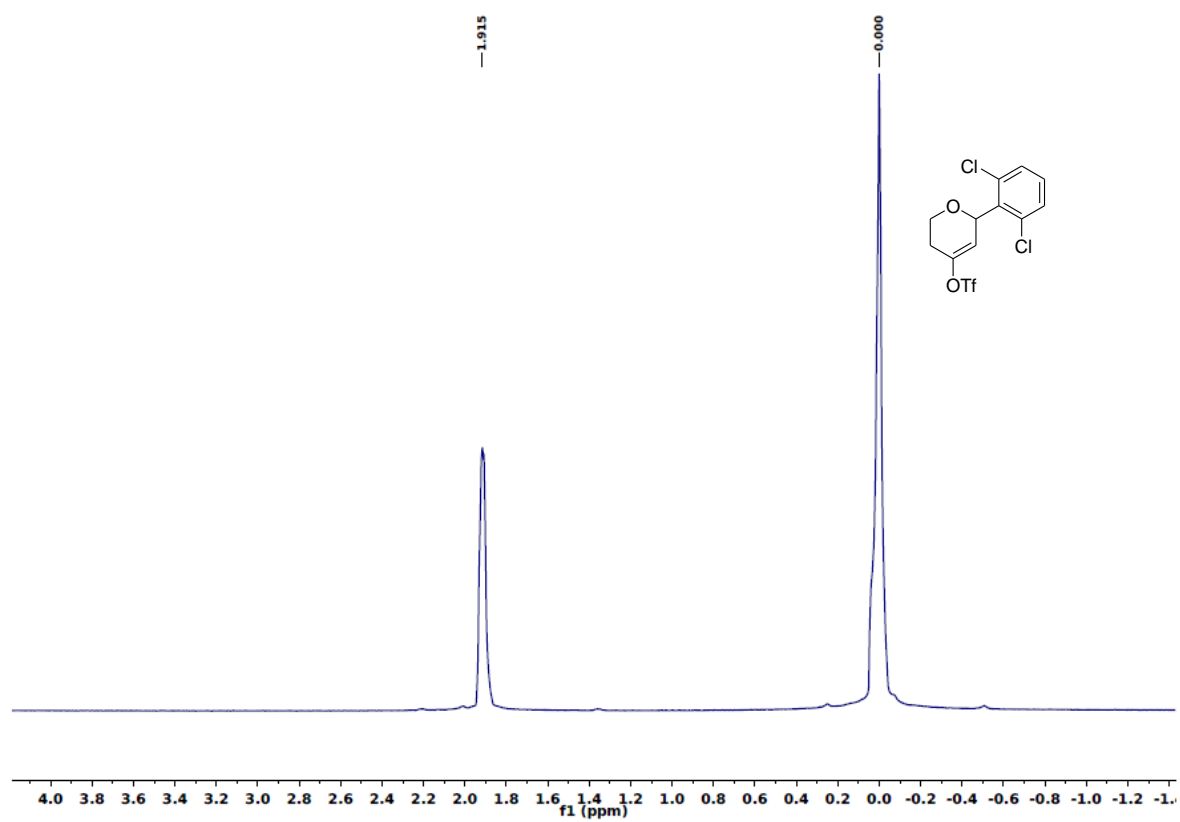

**$^1\text{H}$  NMR and  $^{13}\text{C}$  NMR spectra of compound 3h**

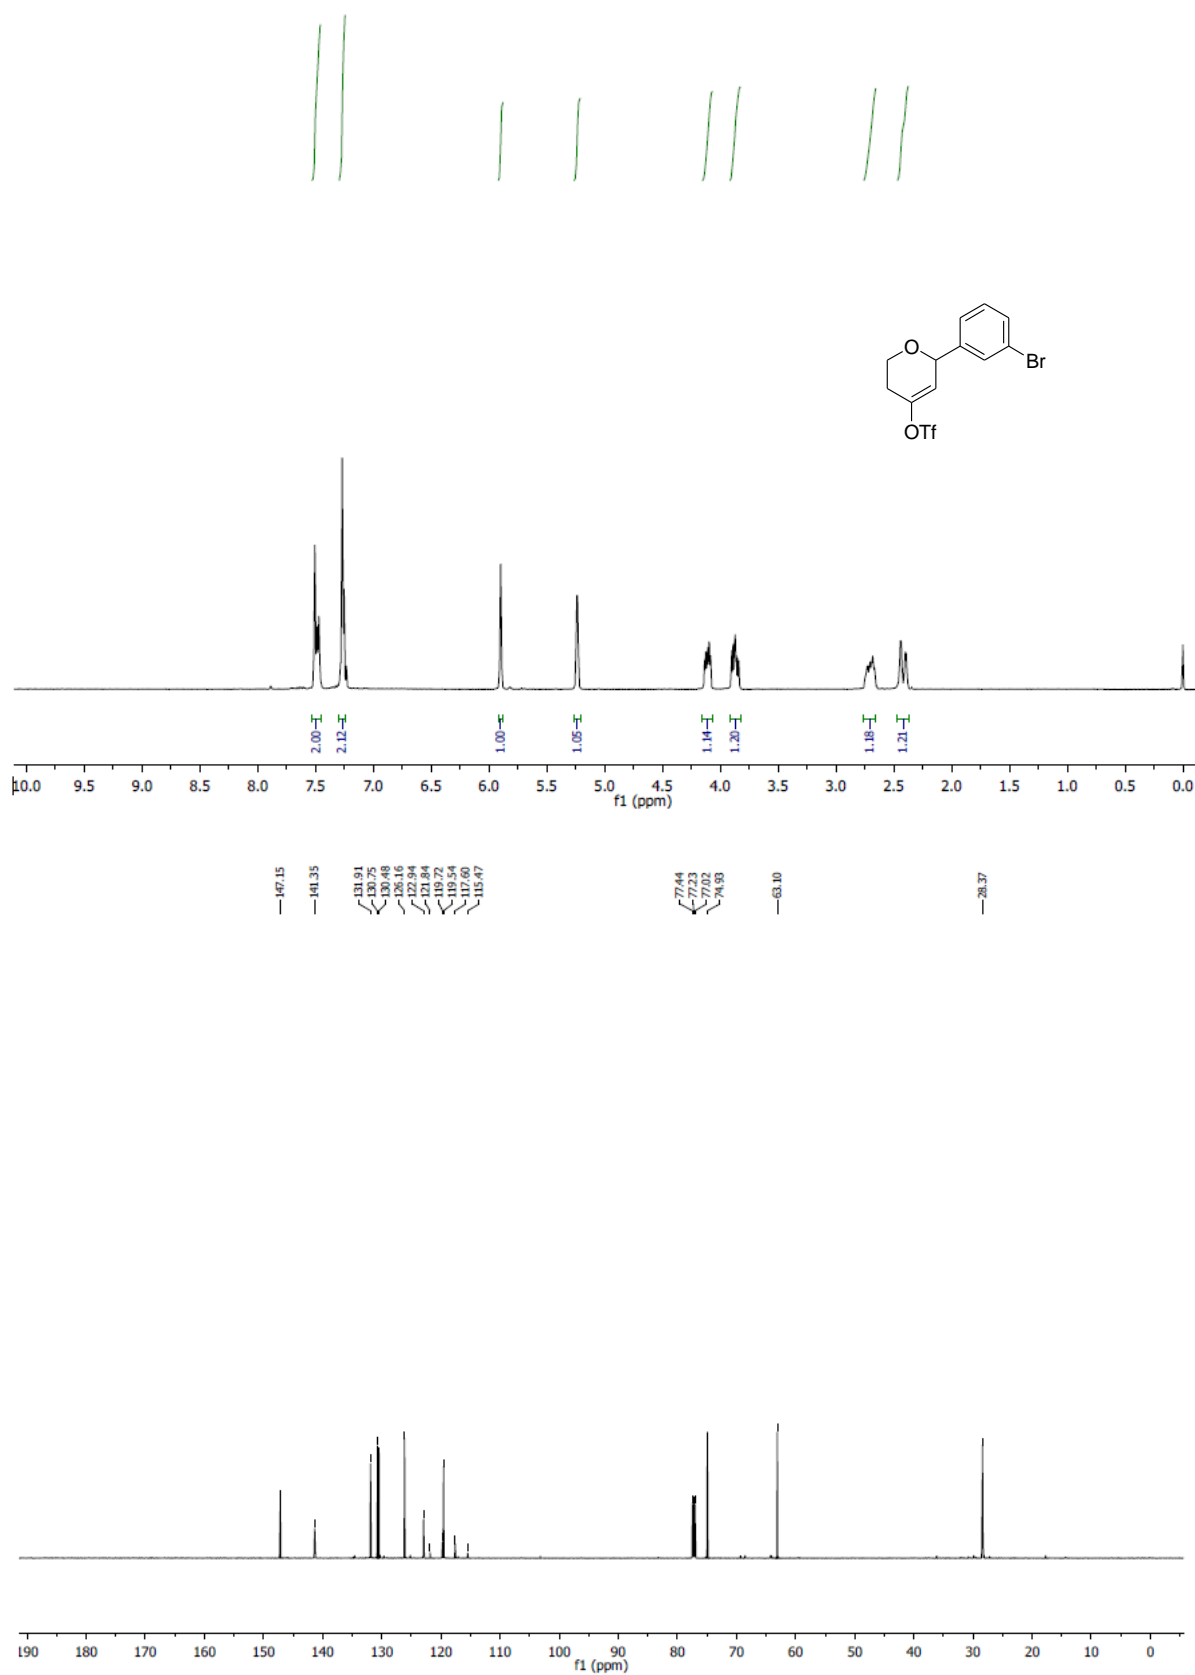

**$^{19}\text{F}$  NMR spectrum of compound 3h**

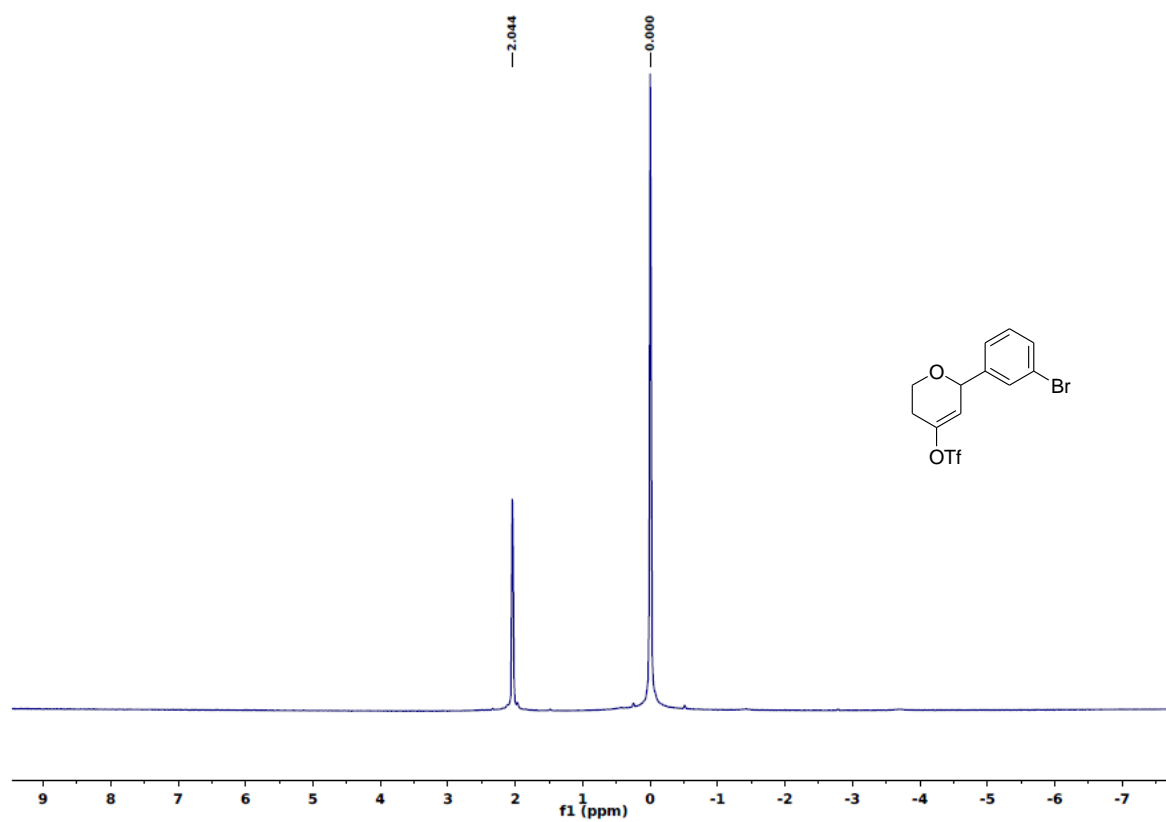



**$^1\text{H}$  NMR and  $^{13}\text{C}$  NMR spectra of compound 3i**

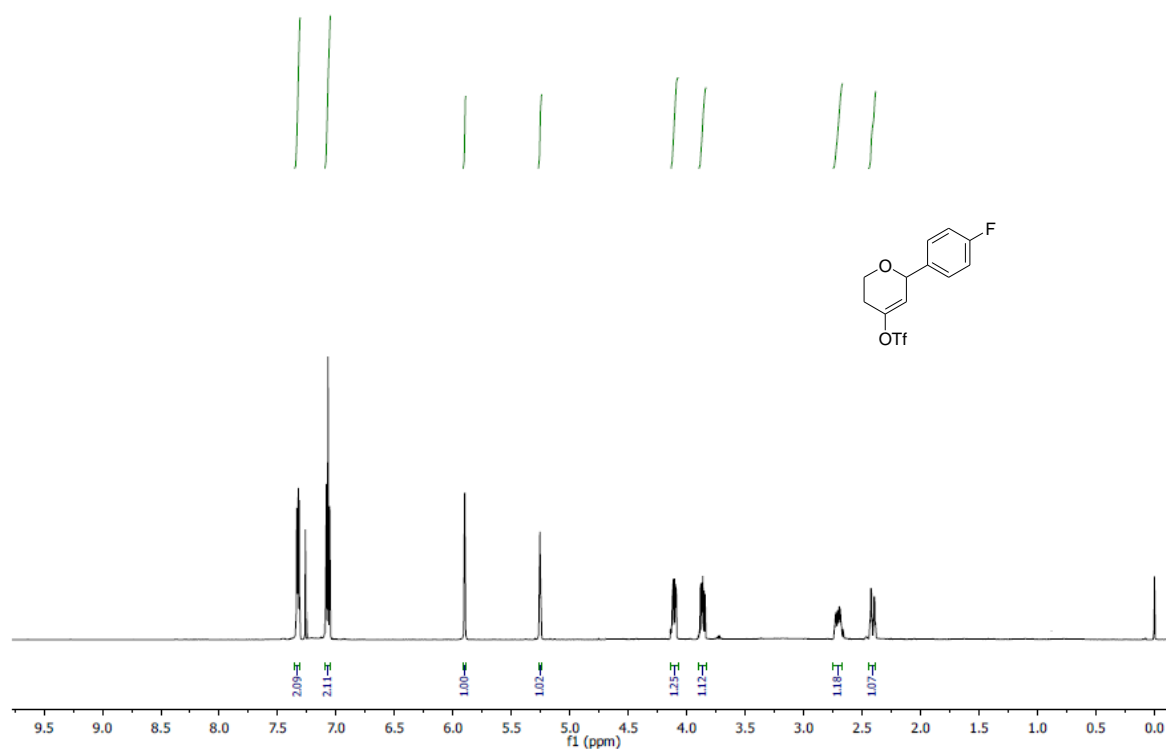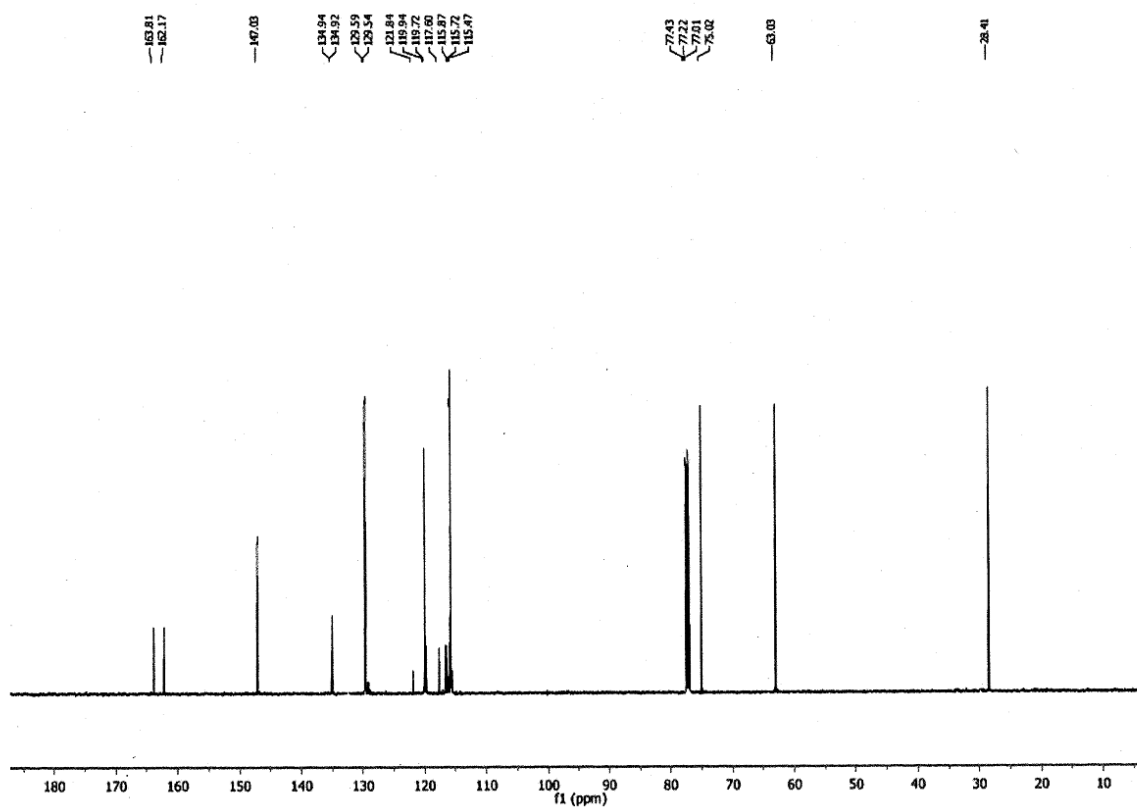

**$^{19}\text{F}$  NMR spectrum of compound 3i**

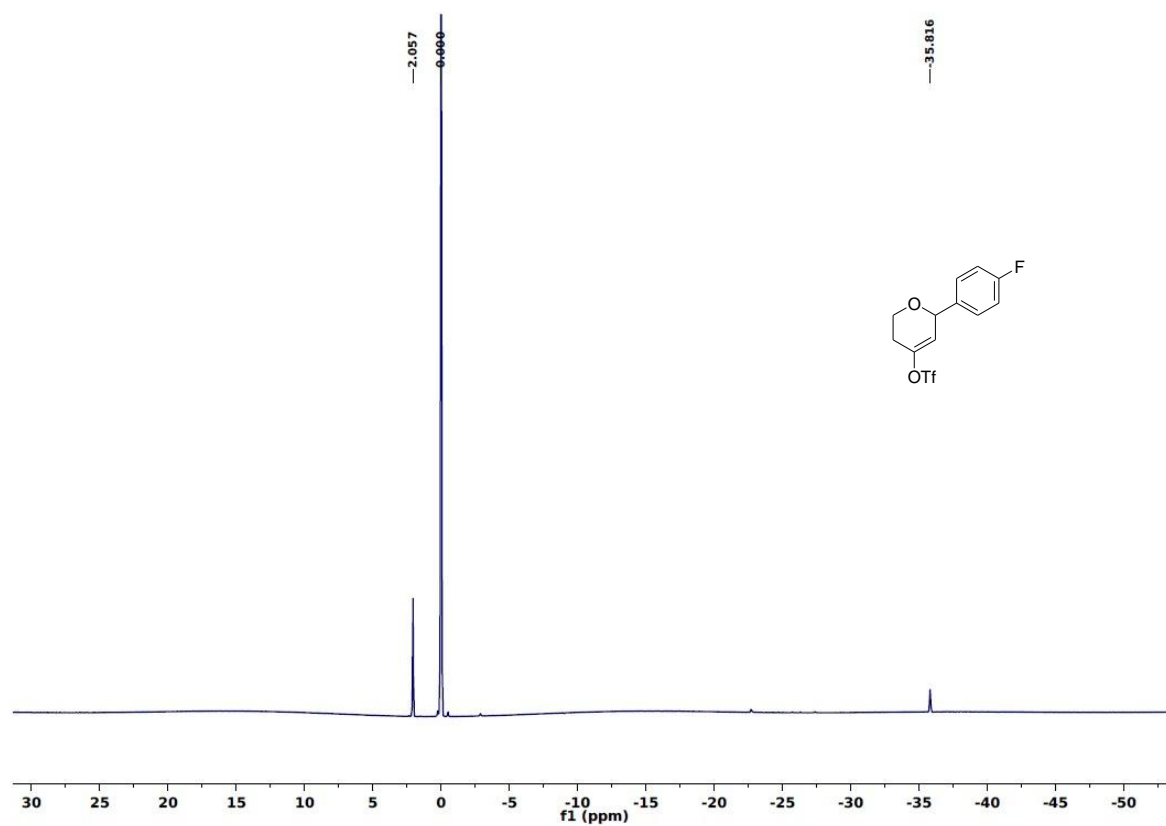

**$^1\text{H}$  NMR and  $^{13}\text{C}$  NMR spectra of compound 3j**

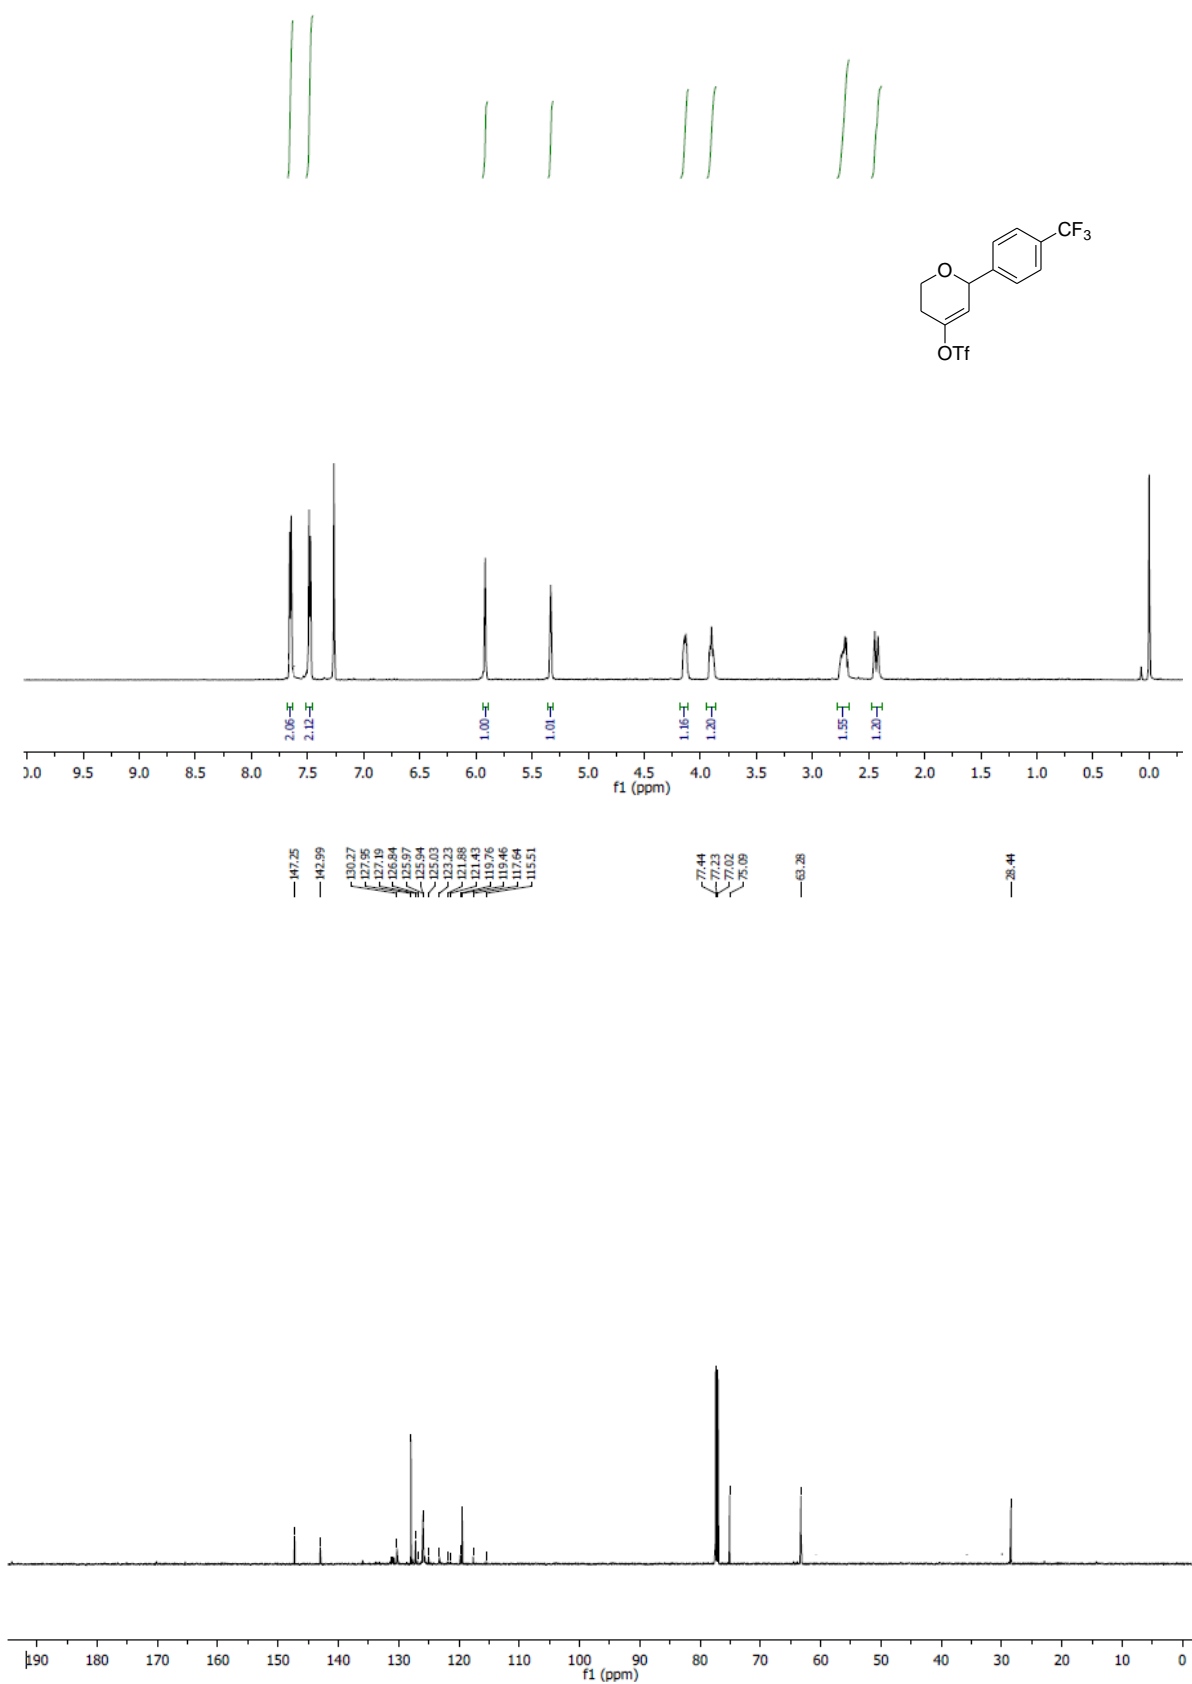

**$^{19}\text{F}$  NMR spectrum of compound 3j**

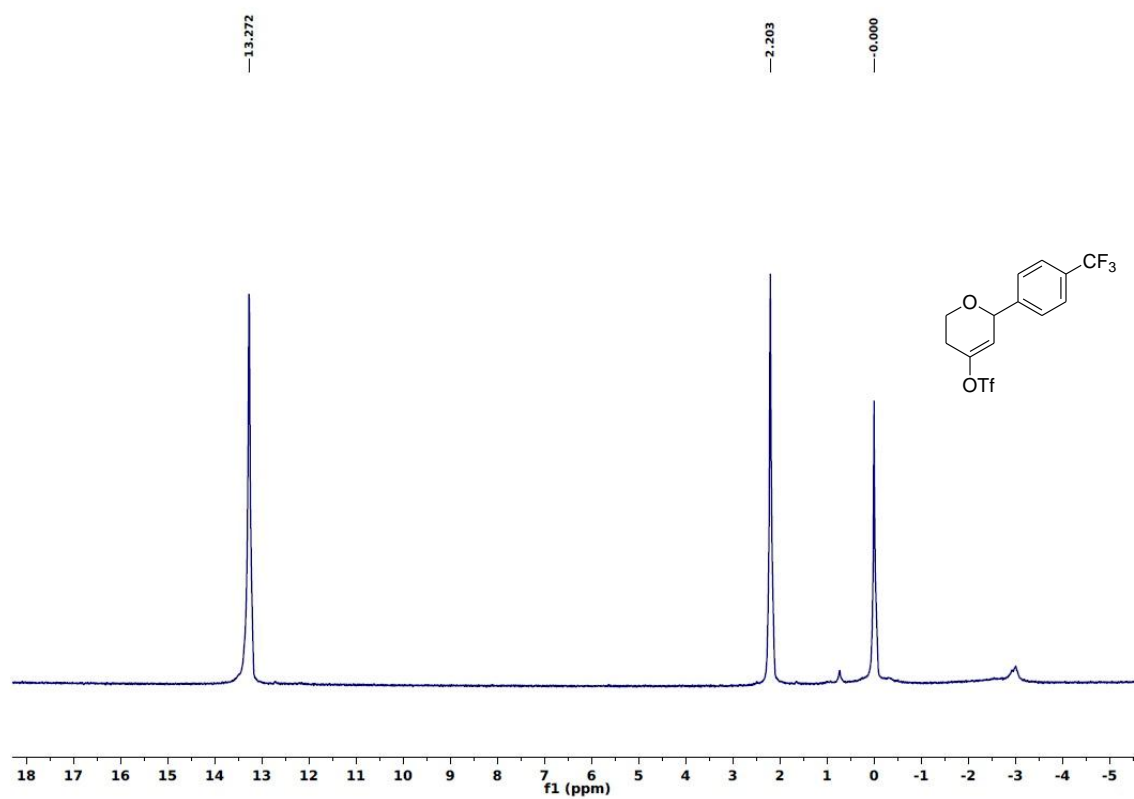

**$^1\text{H}$  NMR and  $^{13}\text{C}$  NMR spectra of compound 3k**

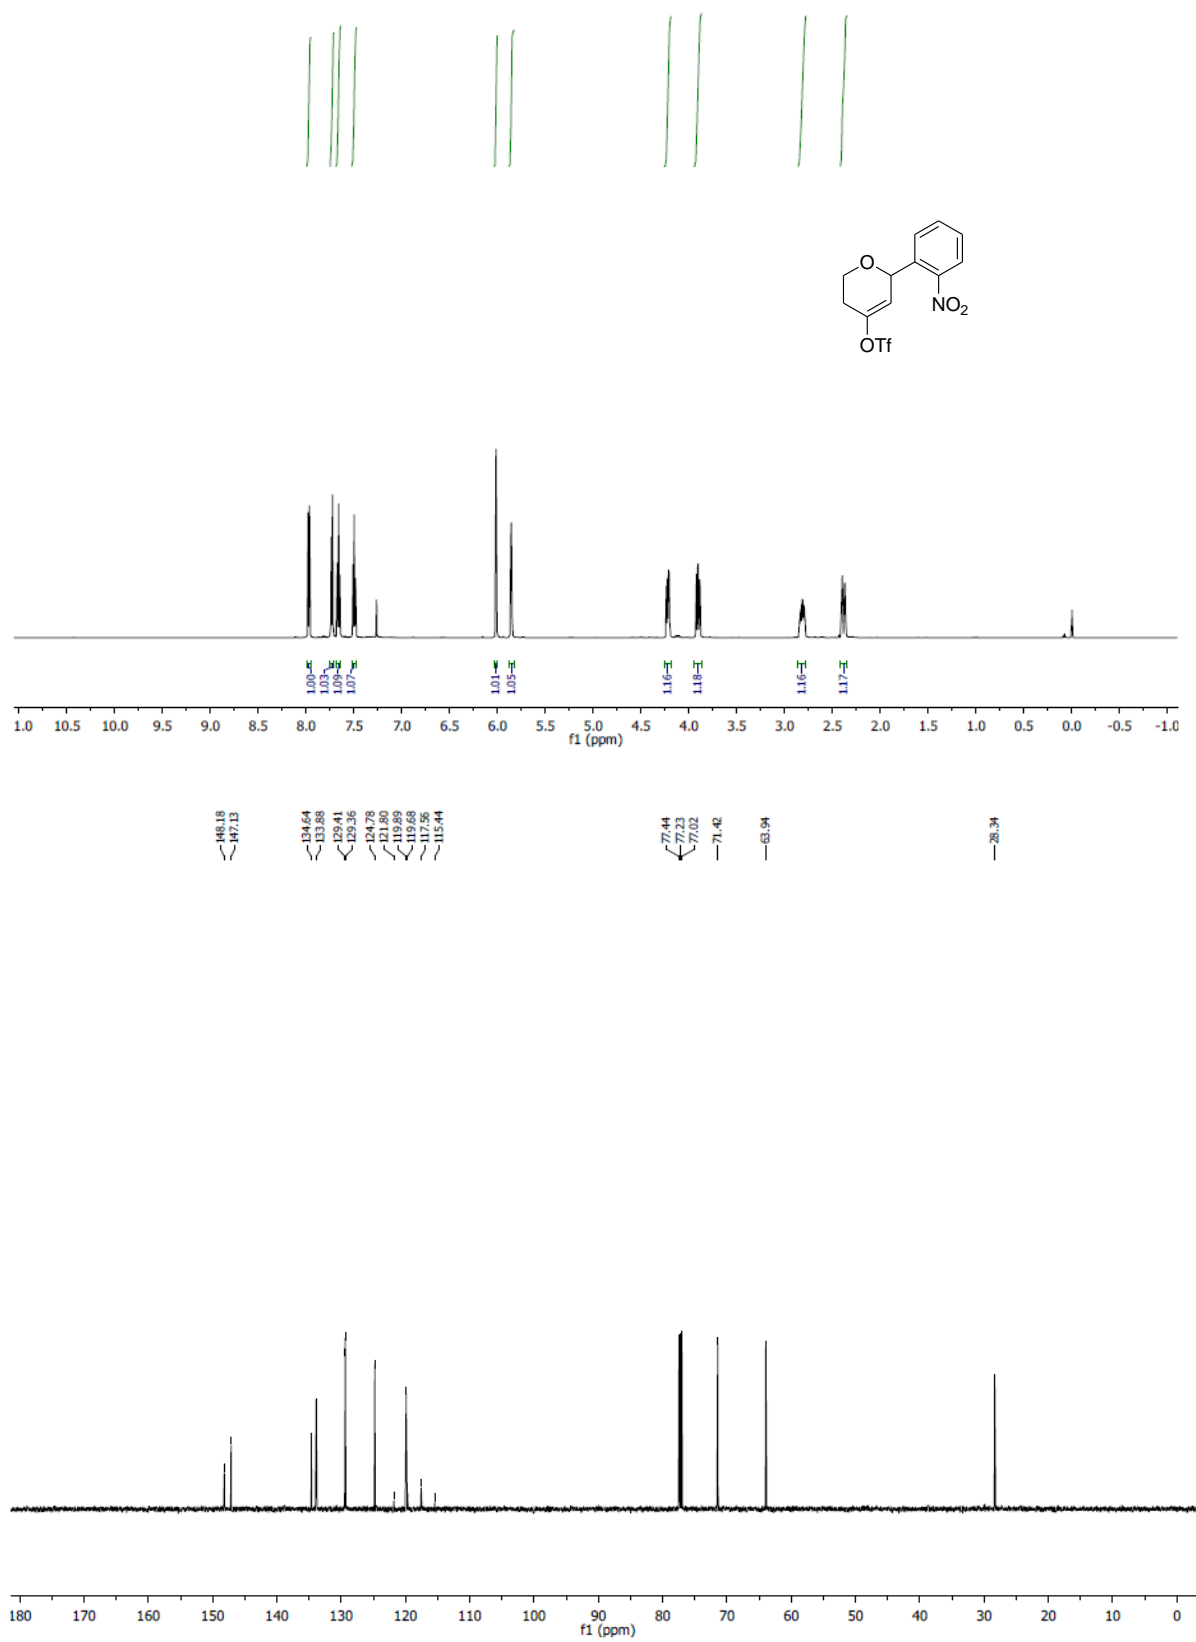

**$^{19}\text{F}$  NMR spectrum of compound 3k**

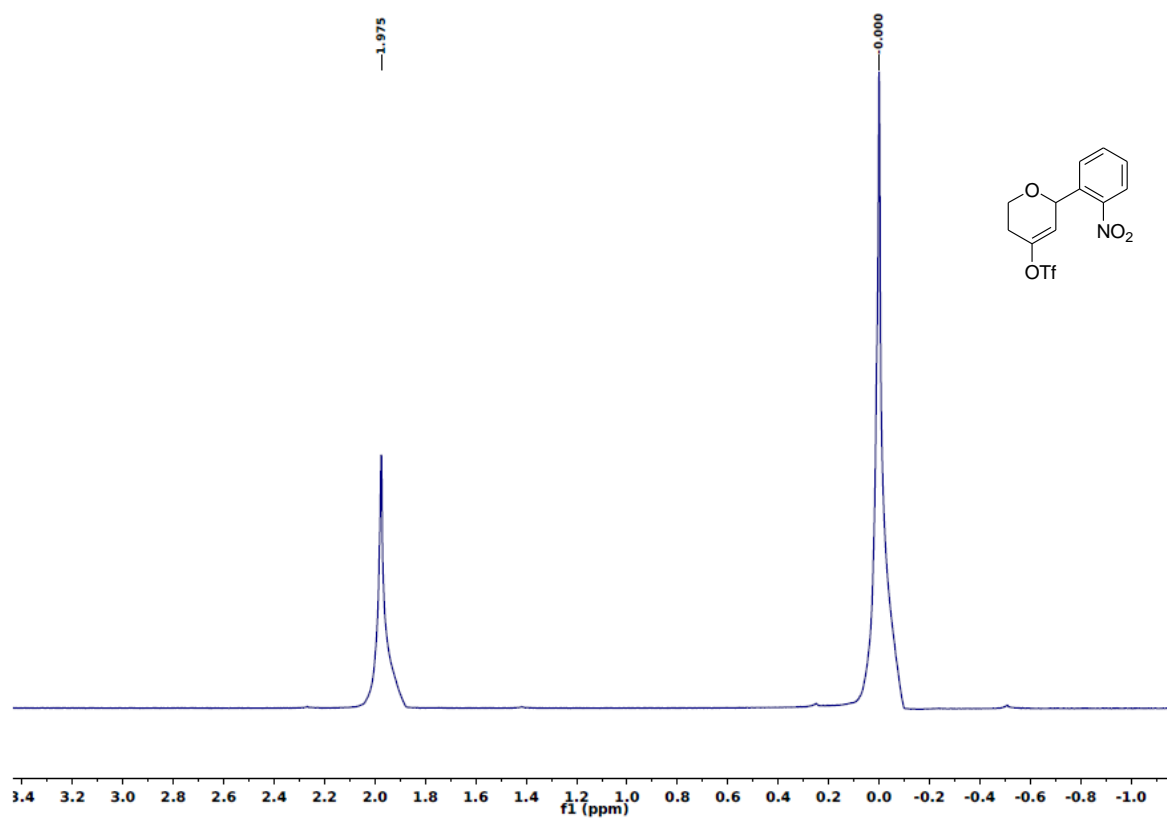

# **$^1\text{H}$ NMR and $^{13}\text{C}$ NMR spectra of compound 3l**

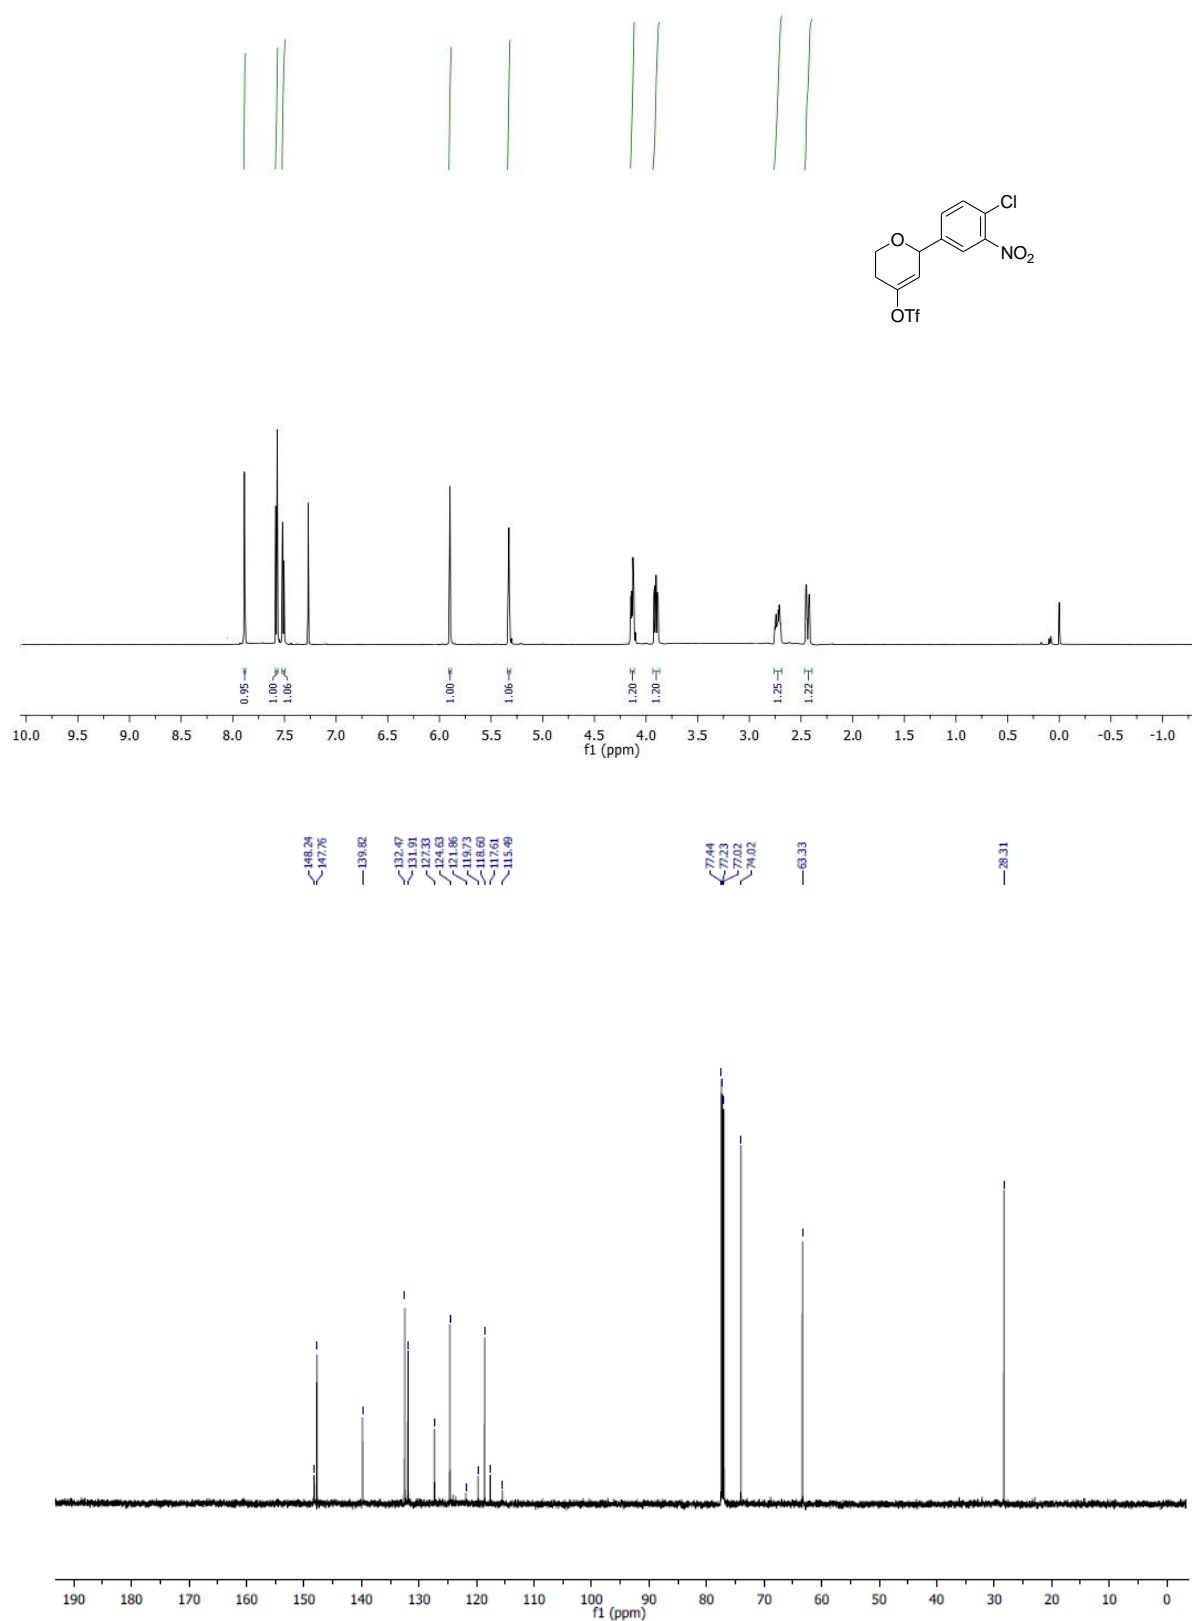

**$^{19}\text{F}$  NMR spectrum of compound 3l**

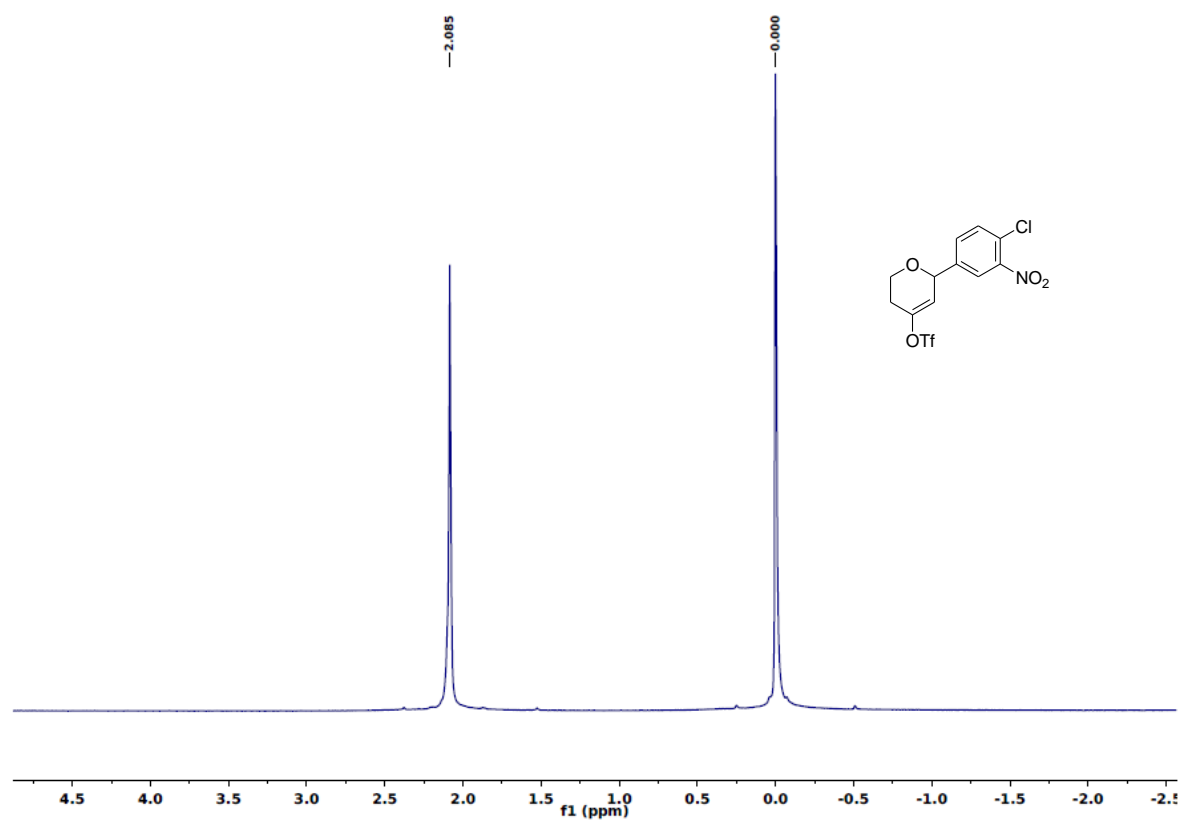



<sup>1</sup>H NMR and <sup>13</sup>C NMR spectra of compound 3m

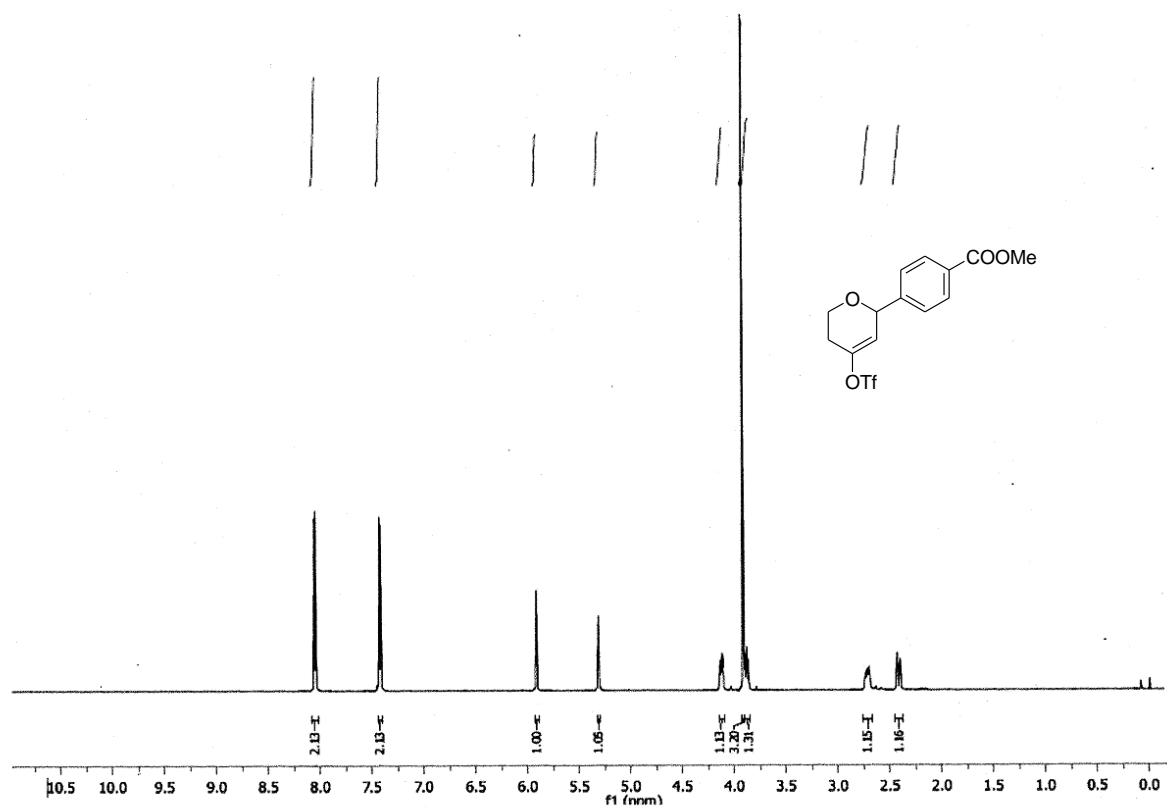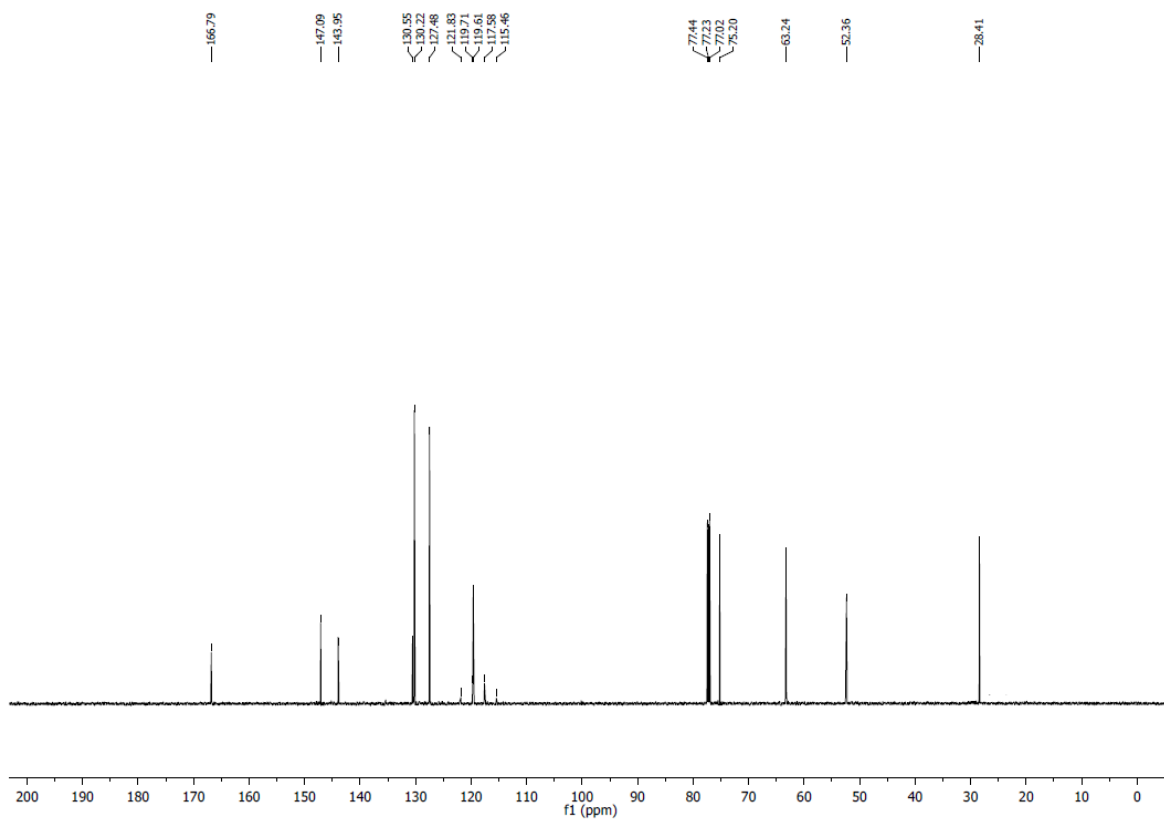

**$^{19}\text{F}$  NMR spectrum of compound 3m**

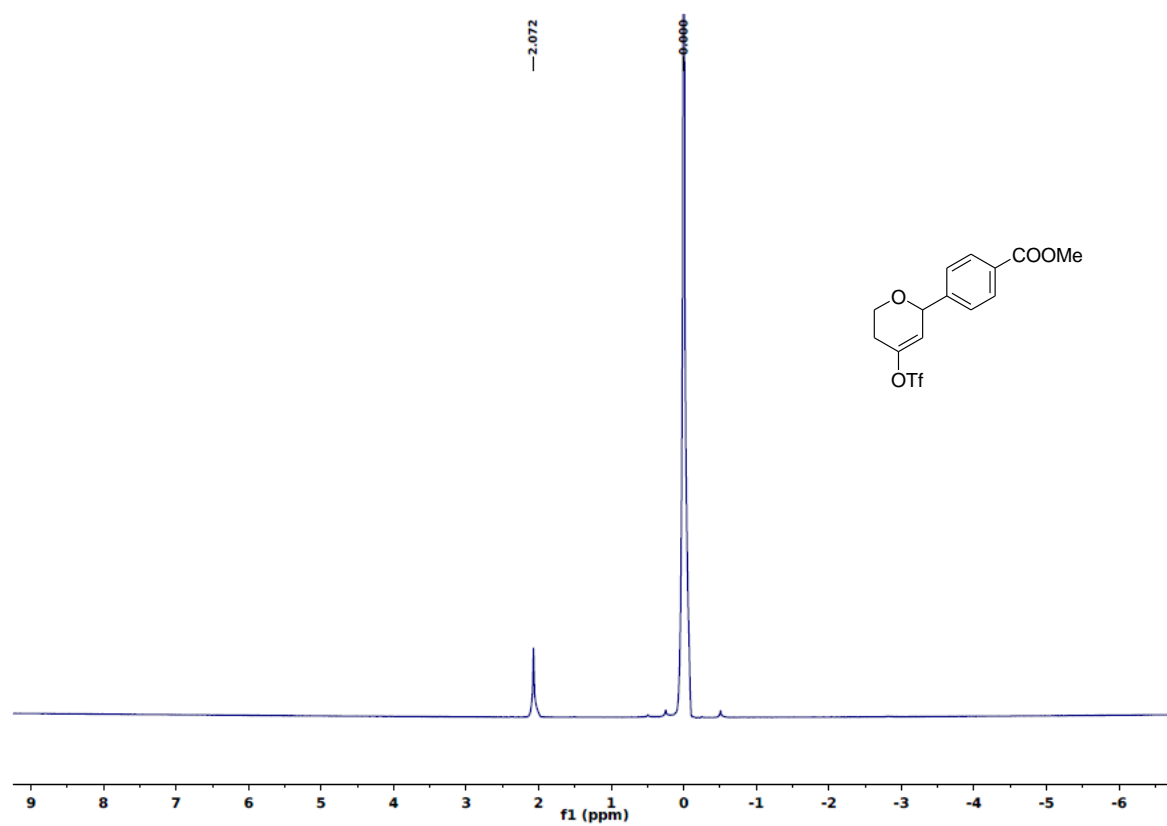

**$^1\text{H}$  NMR and  $^{13}\text{C}$  NMR spectra of compound 3n**

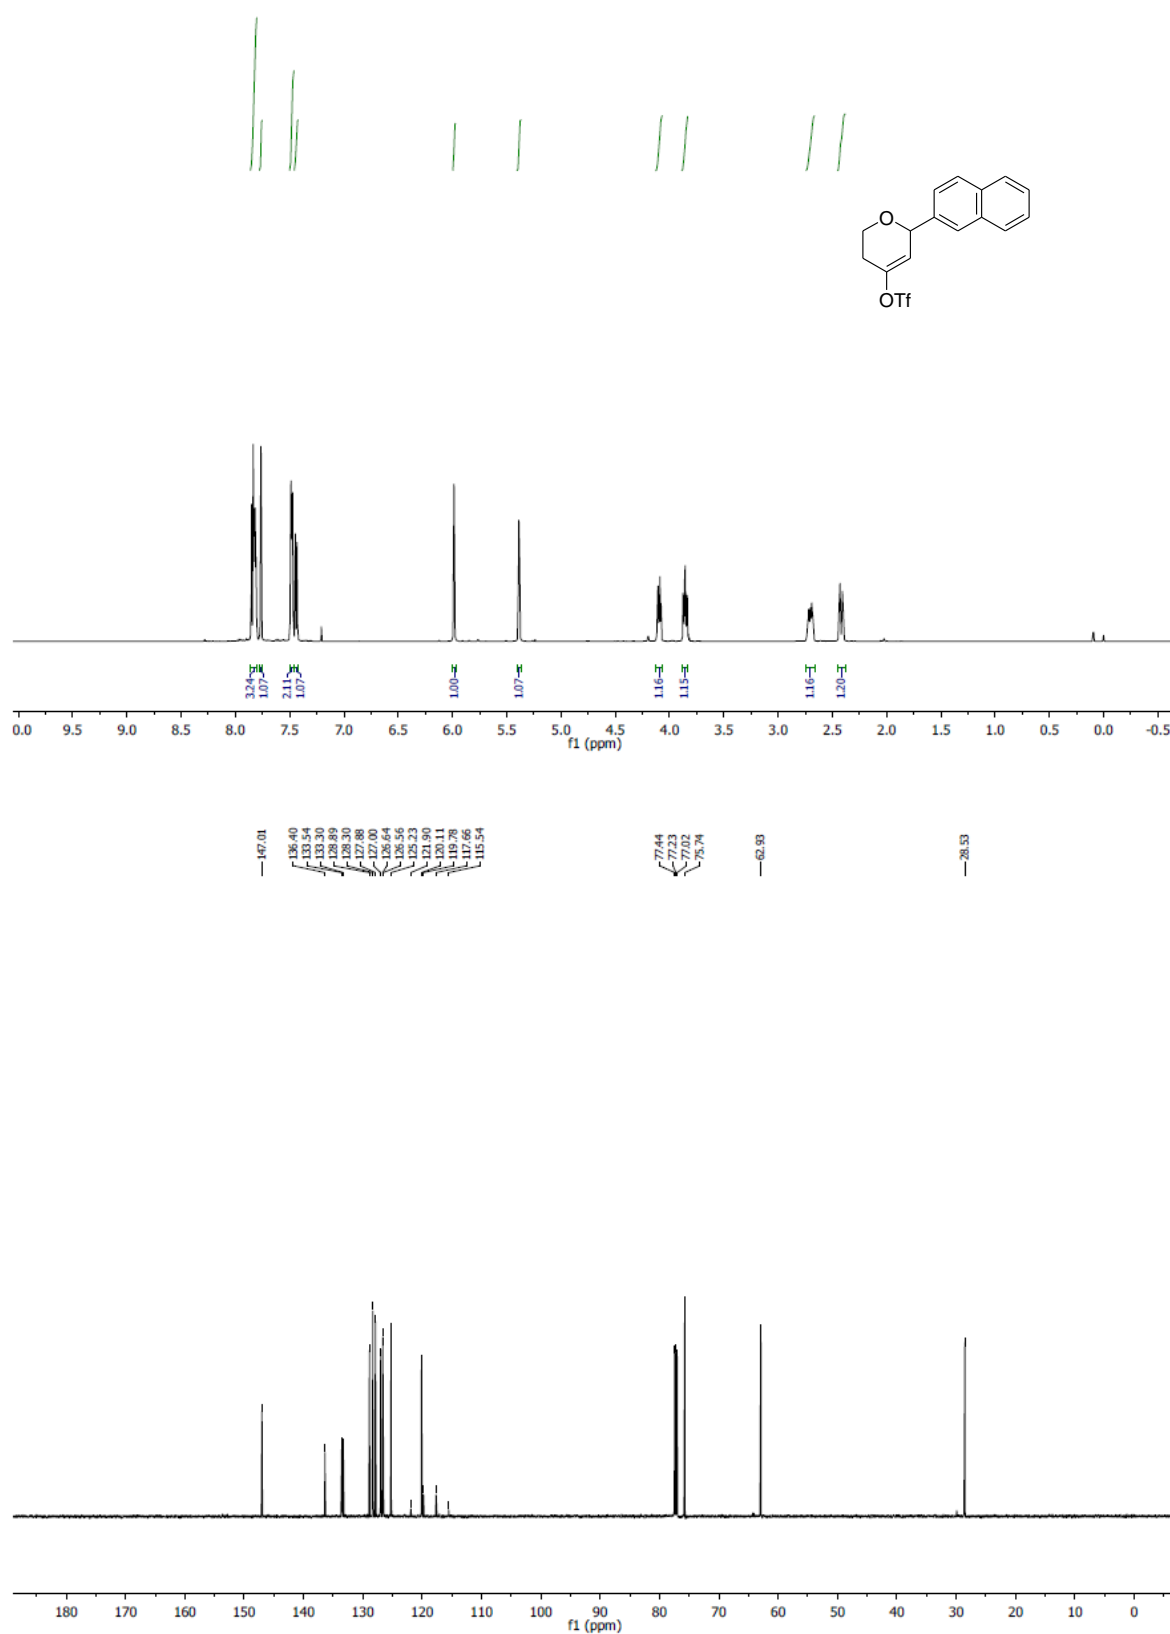

**$^{19}\text{F}$  NMR spectrum of compound 3n**

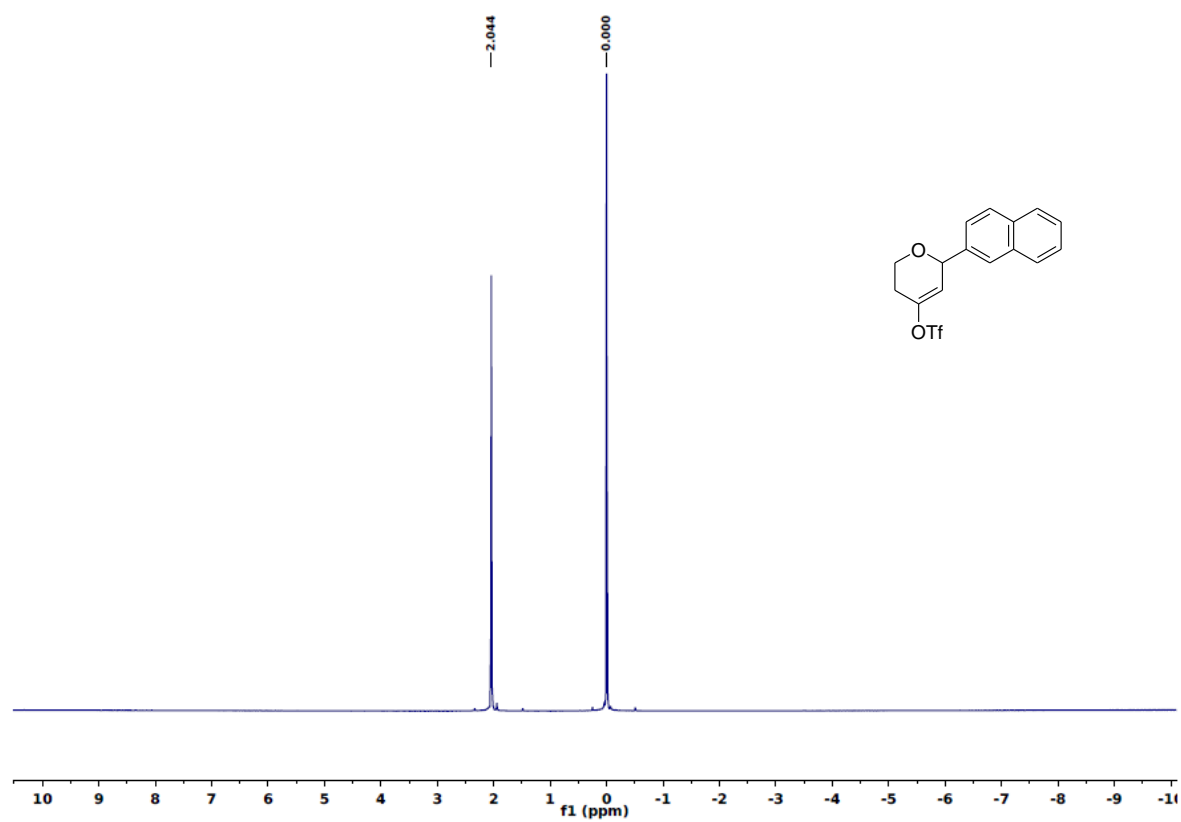

**$^1\text{H}$  NMR and  $^{13}\text{C}$  NMR spectra of compound 3o**

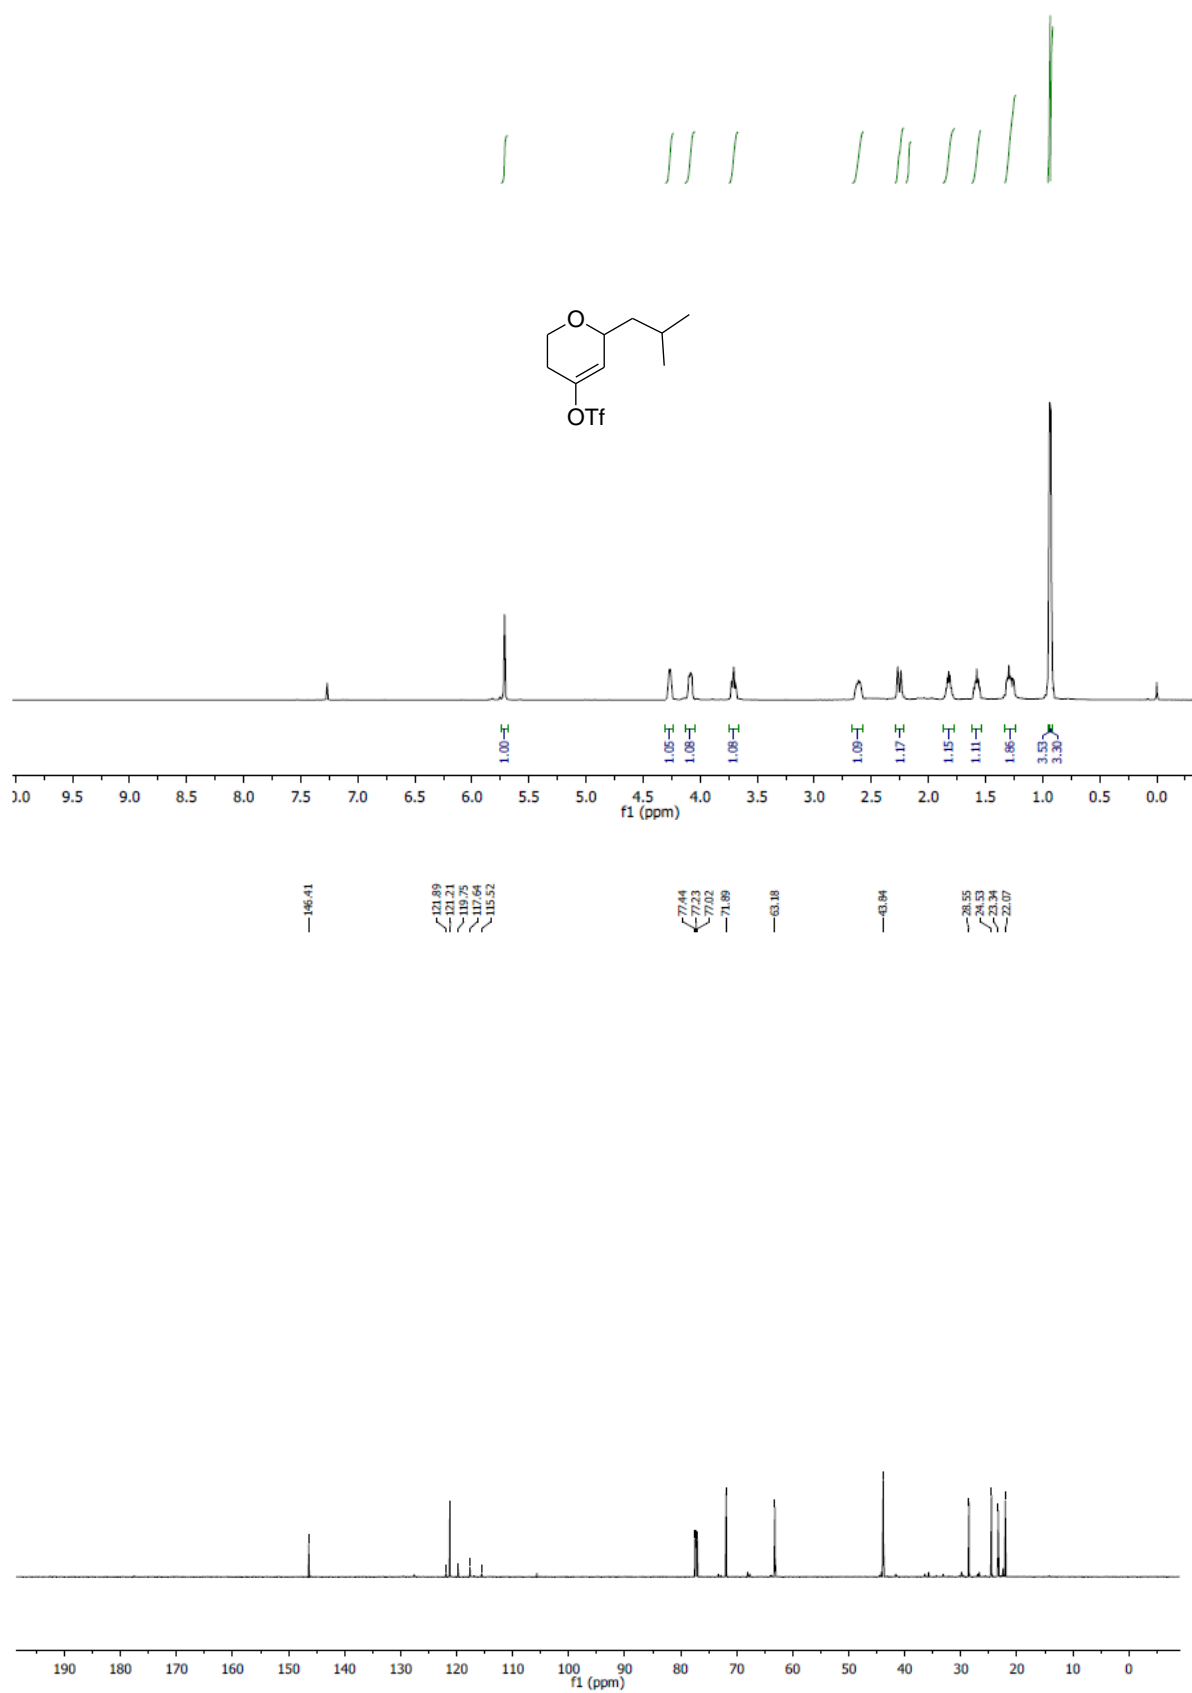

**$^{19}\text{F}$  NMR spectrum of compound 3o**

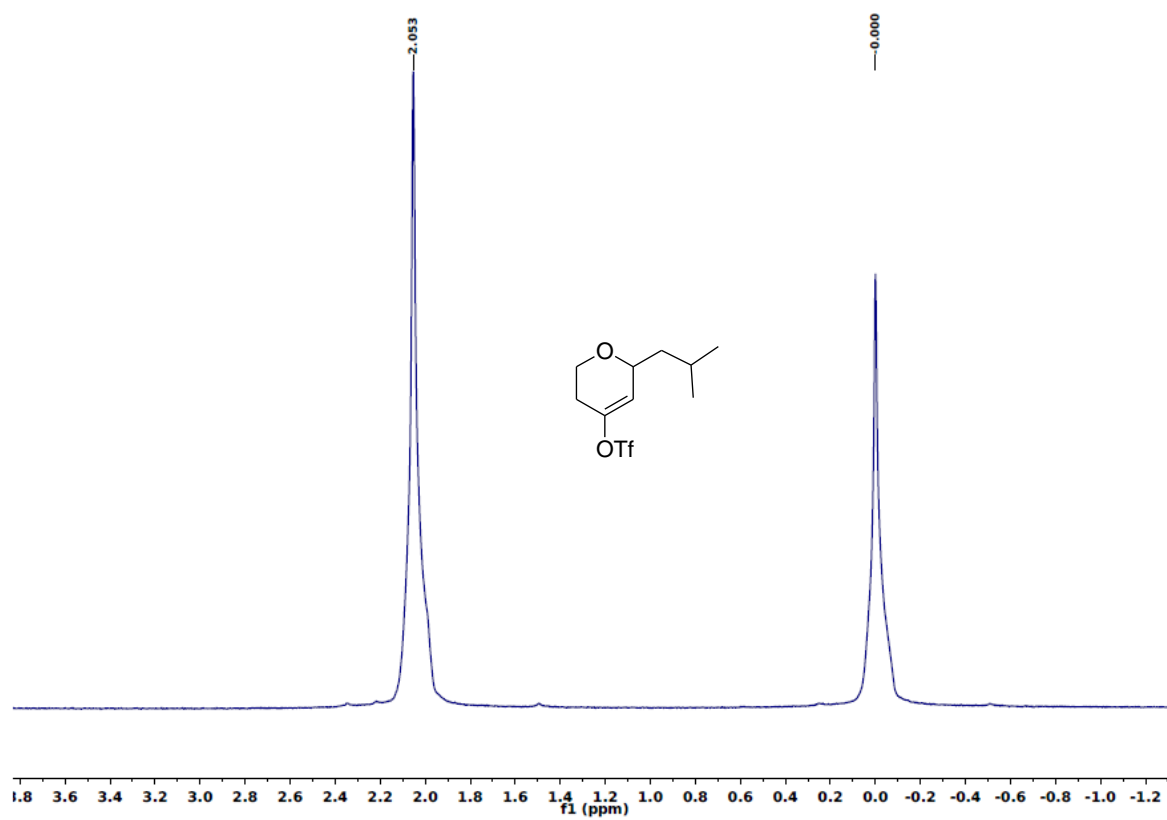

### <sup>1</sup>H NMR and <sup>13</sup>C NMR spectra of compound 3p

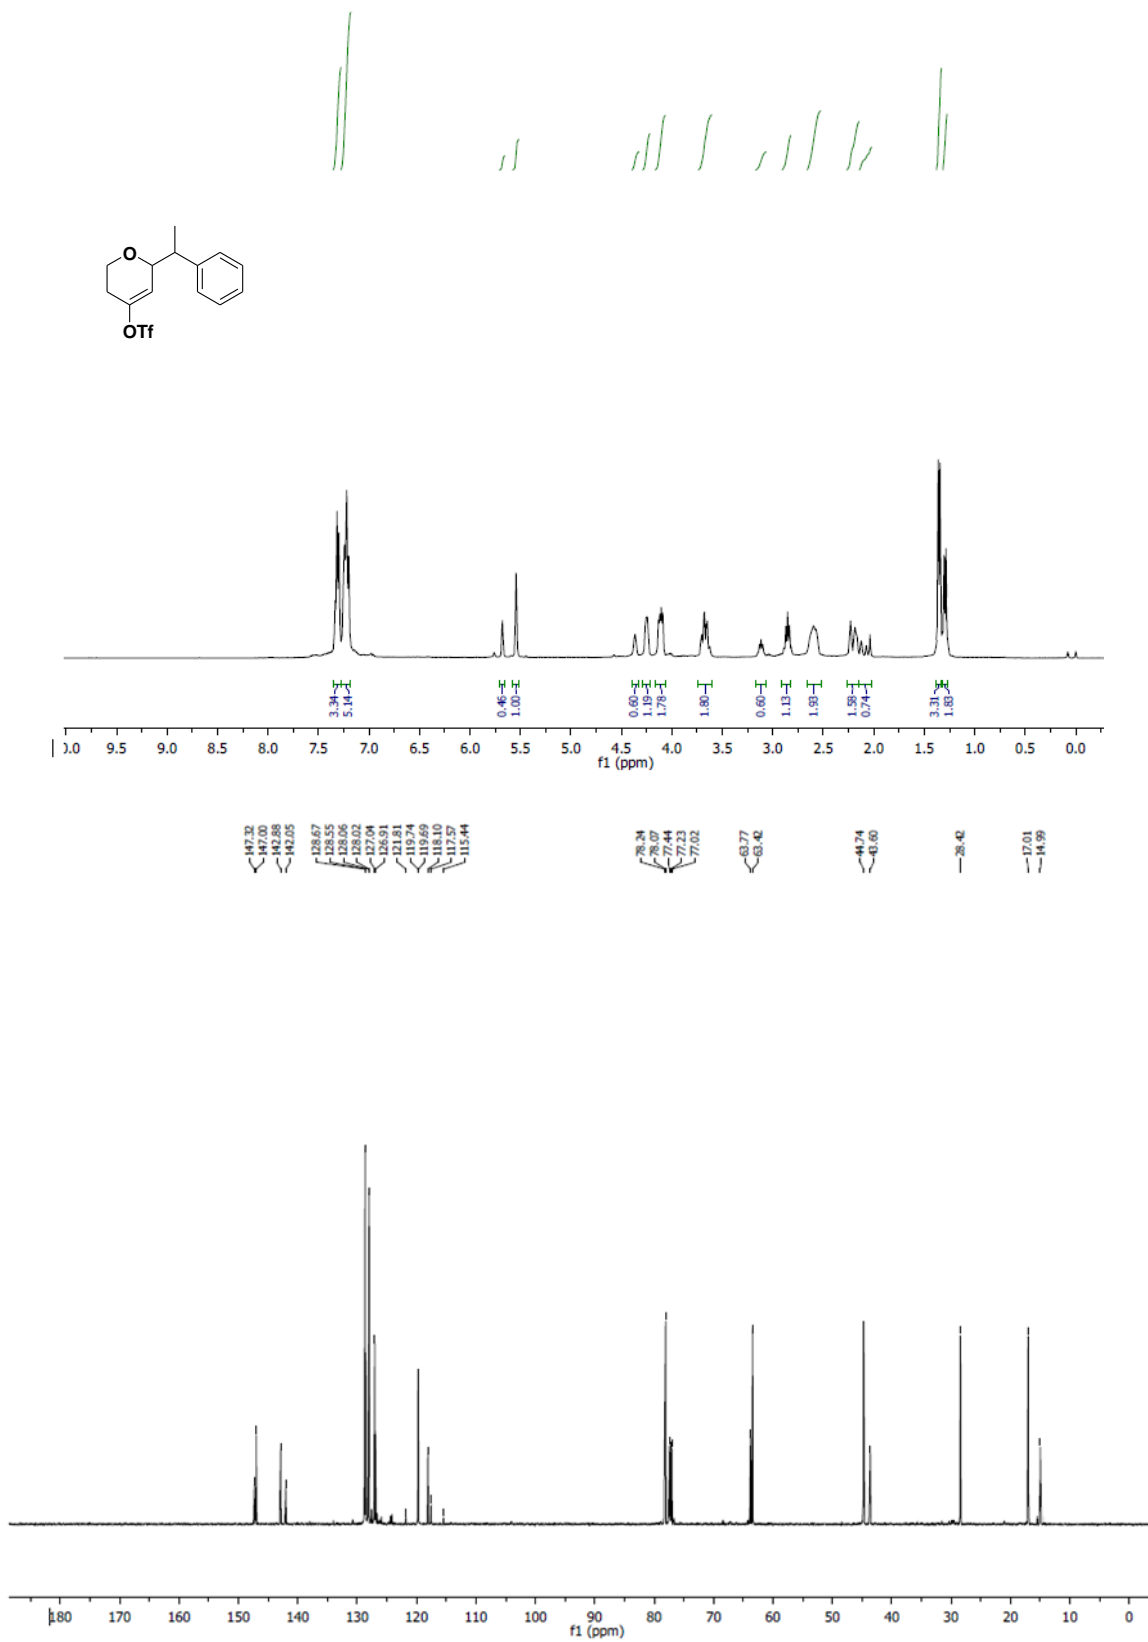

**$^{19}\text{F}$  NMR spectrum of compound 3p**

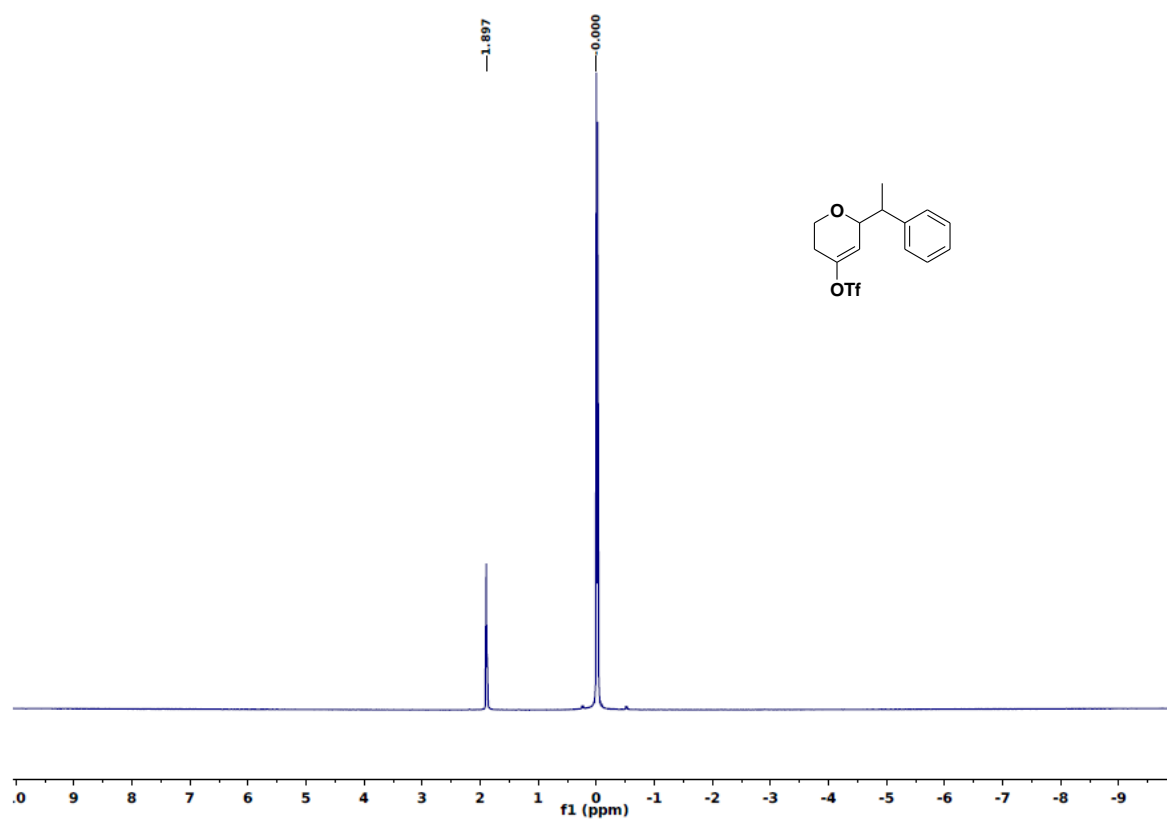



<sup>1</sup>H NMR and <sup>13</sup>C NMR spectra of compound 8a

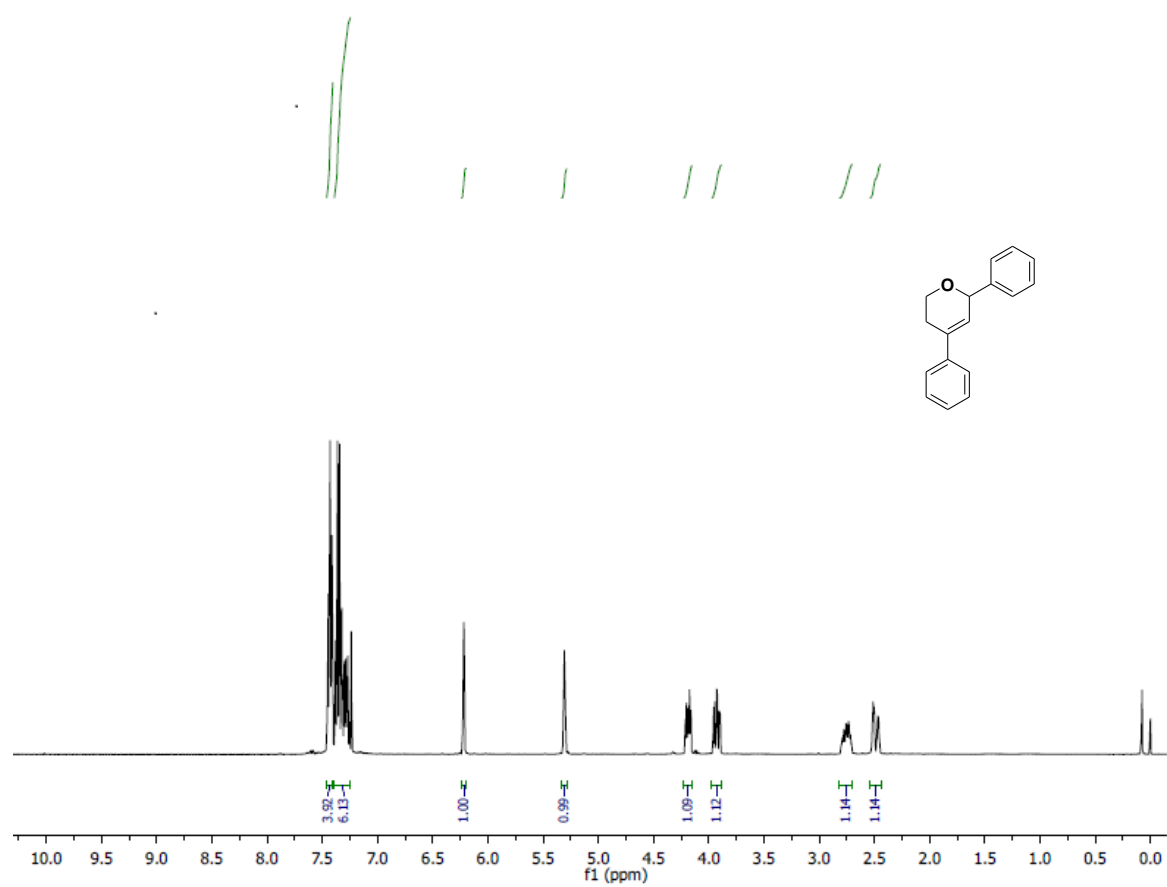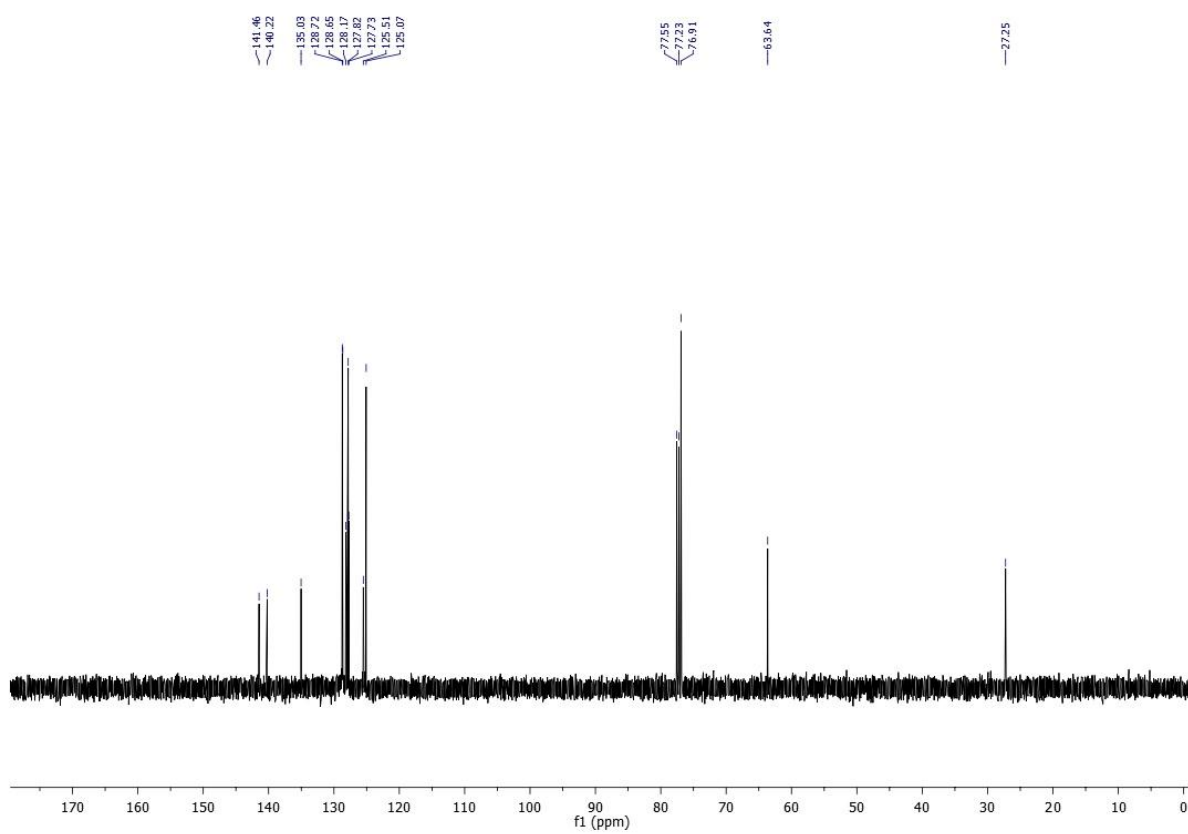

**$^1\text{H}$  NMR and  $^{13}\text{C}$  NMR spectra of compound 8b**

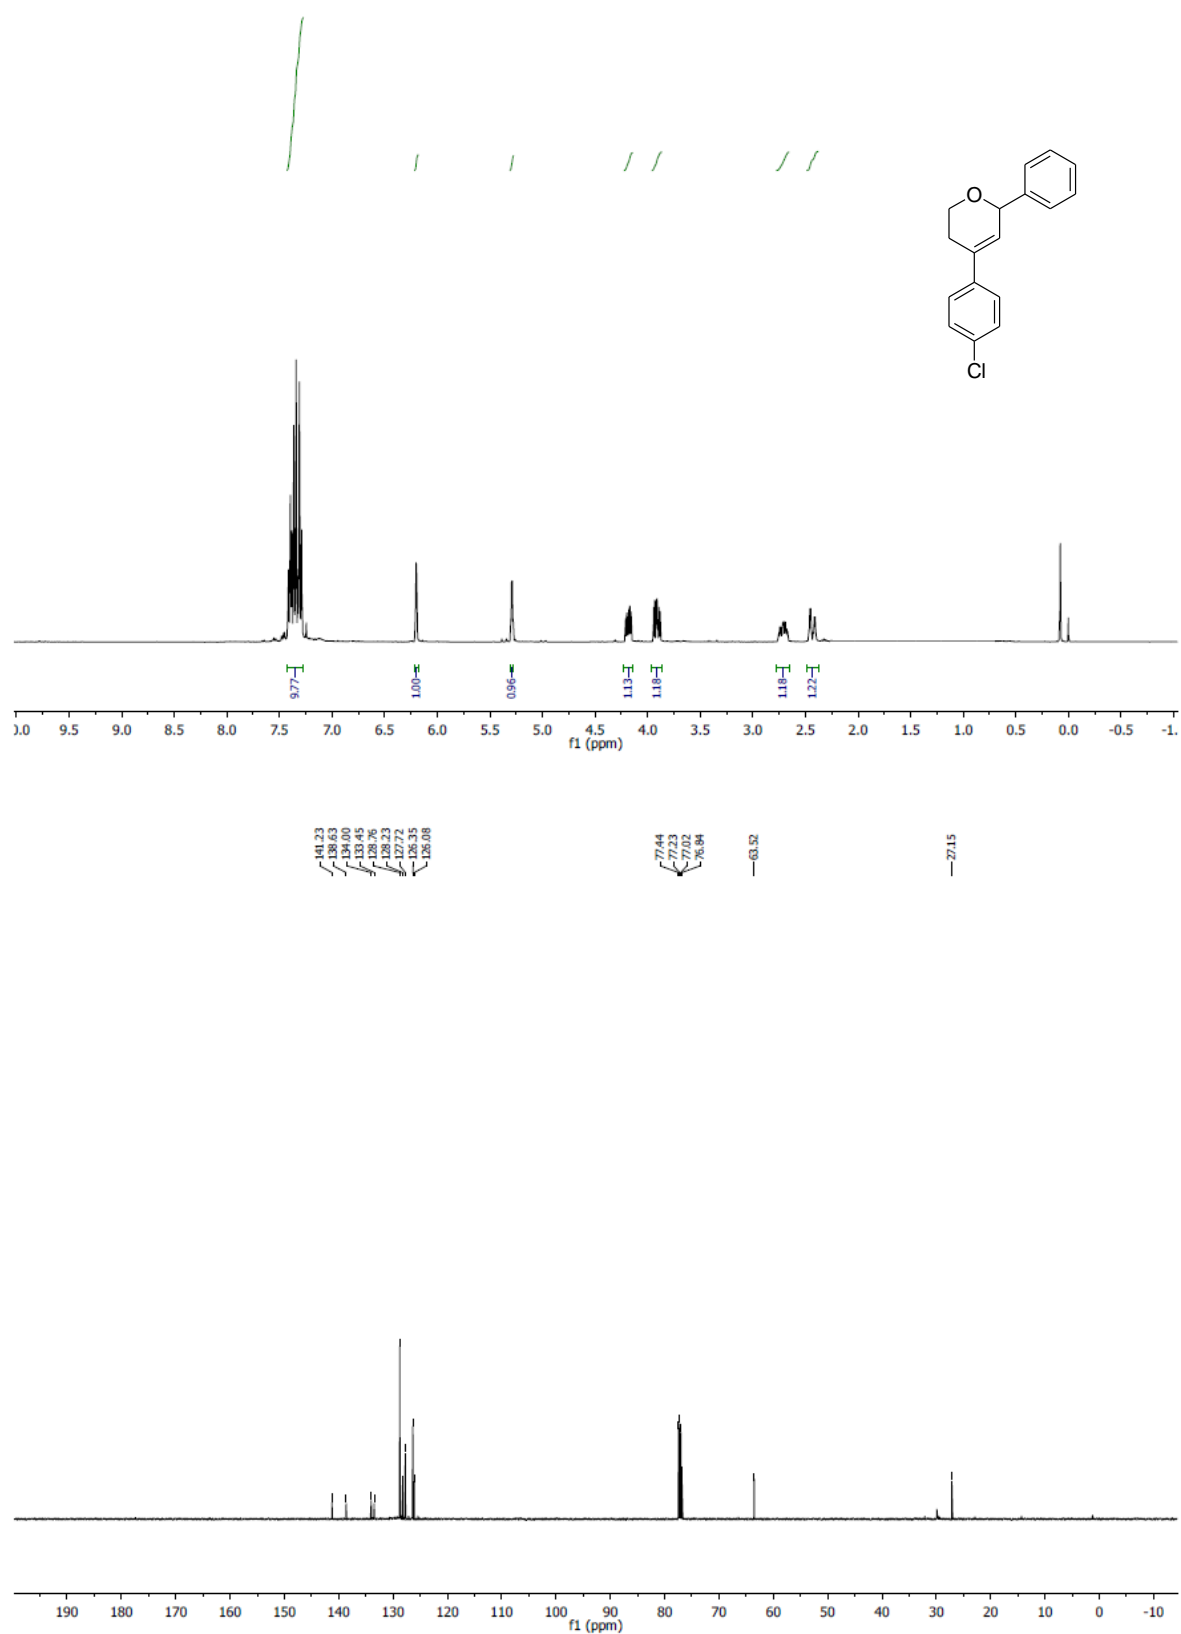

**$^1\text{H}$  NMR and  $^{13}\text{C}$  NMR spectra of compound 8c**

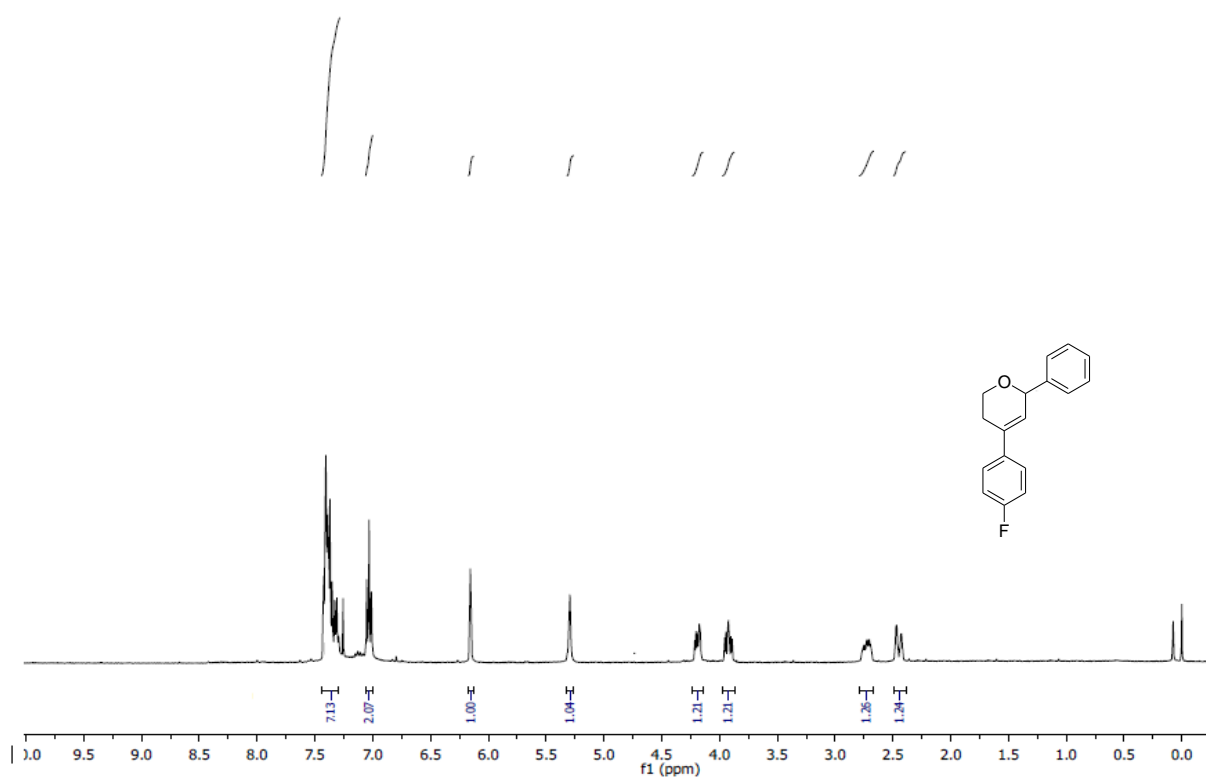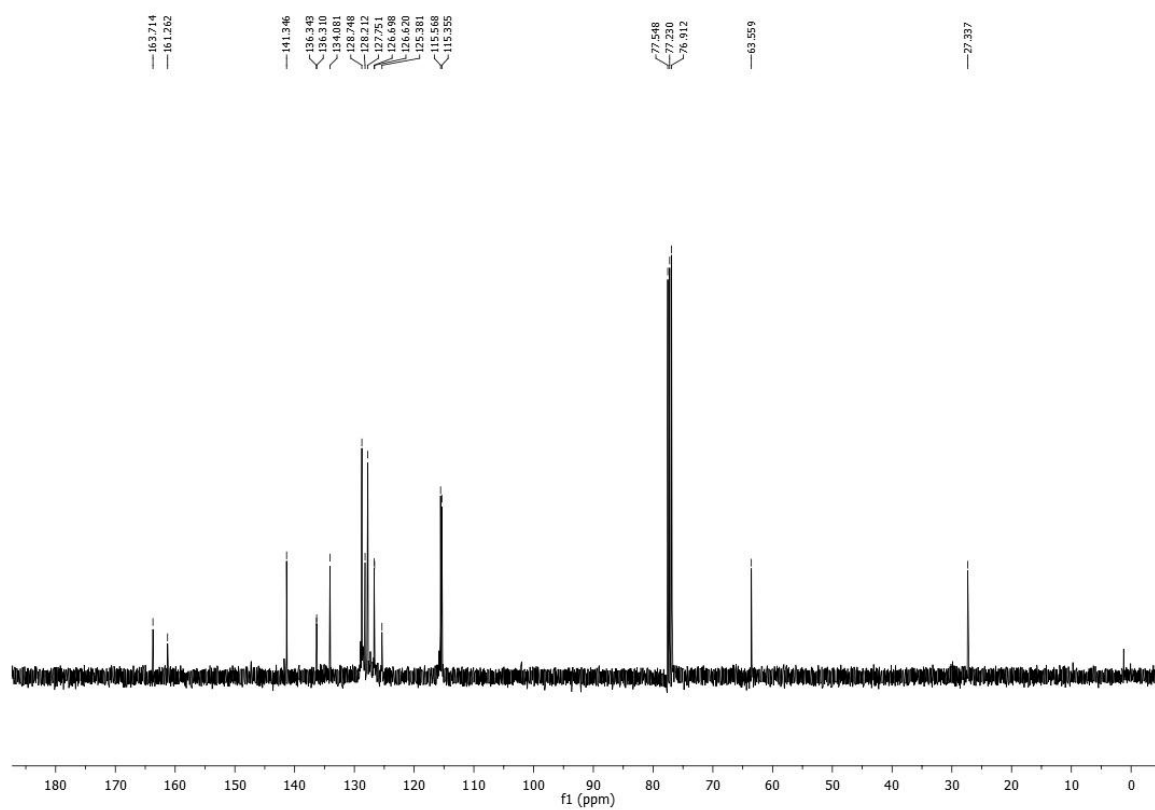

**$^{19}\text{F}$  NMR spectrum of compound 8c**

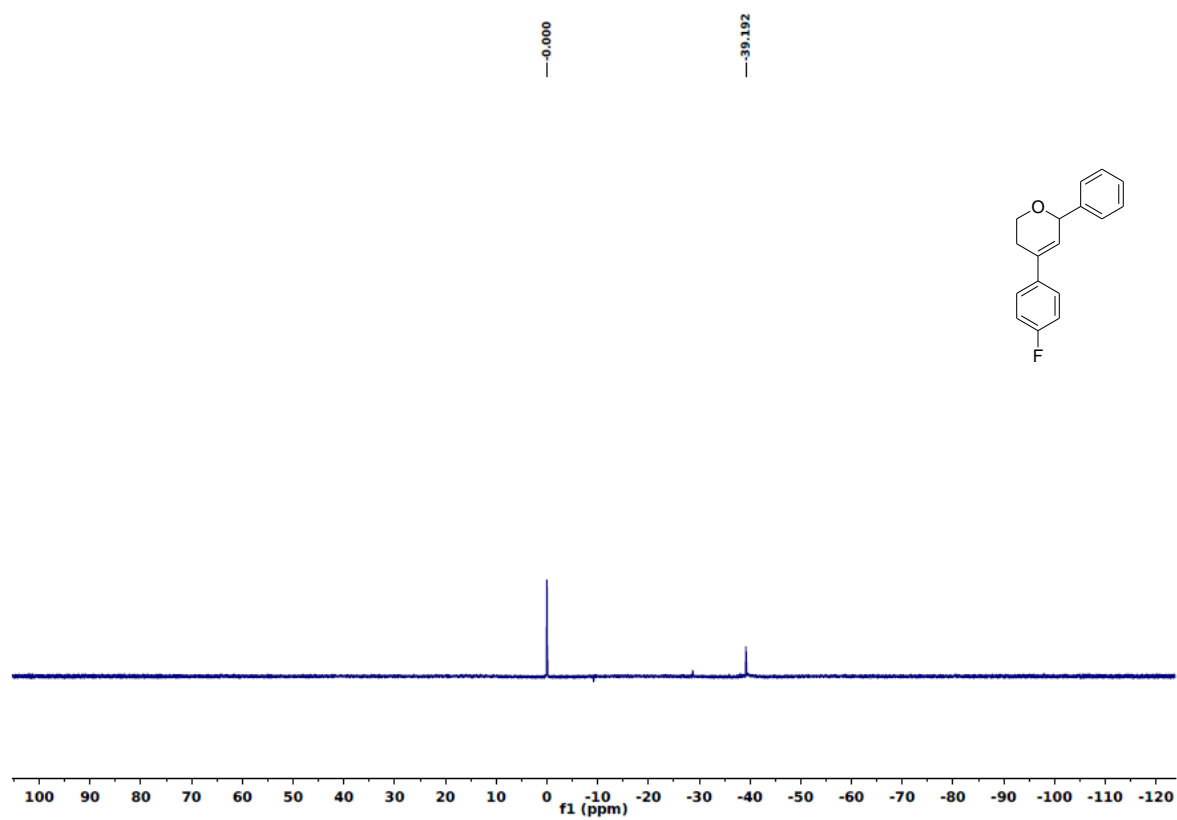

# <sup>1</sup>H NMR and <sup>13</sup>C NMR spectra of compound 8d

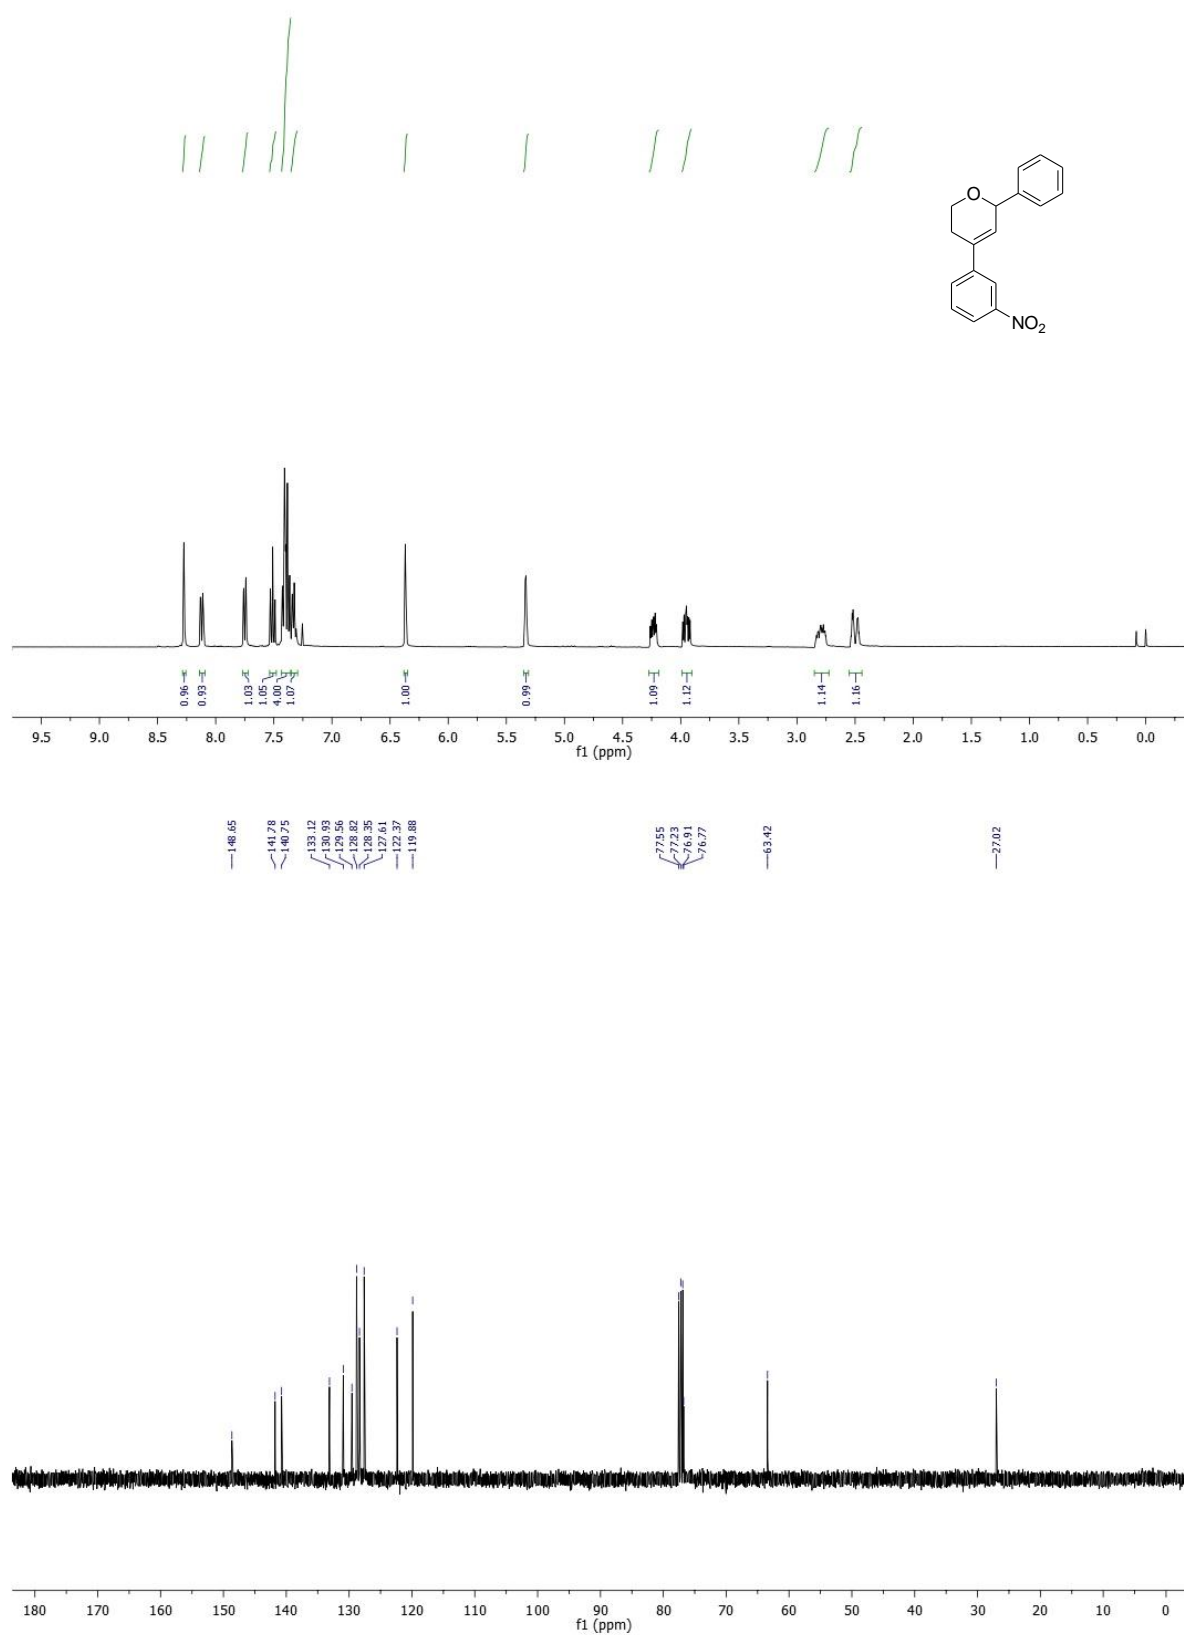

**$^1\text{H}$  NMR and  $^{13}\text{C}$  NMR spectra of compound 8e**

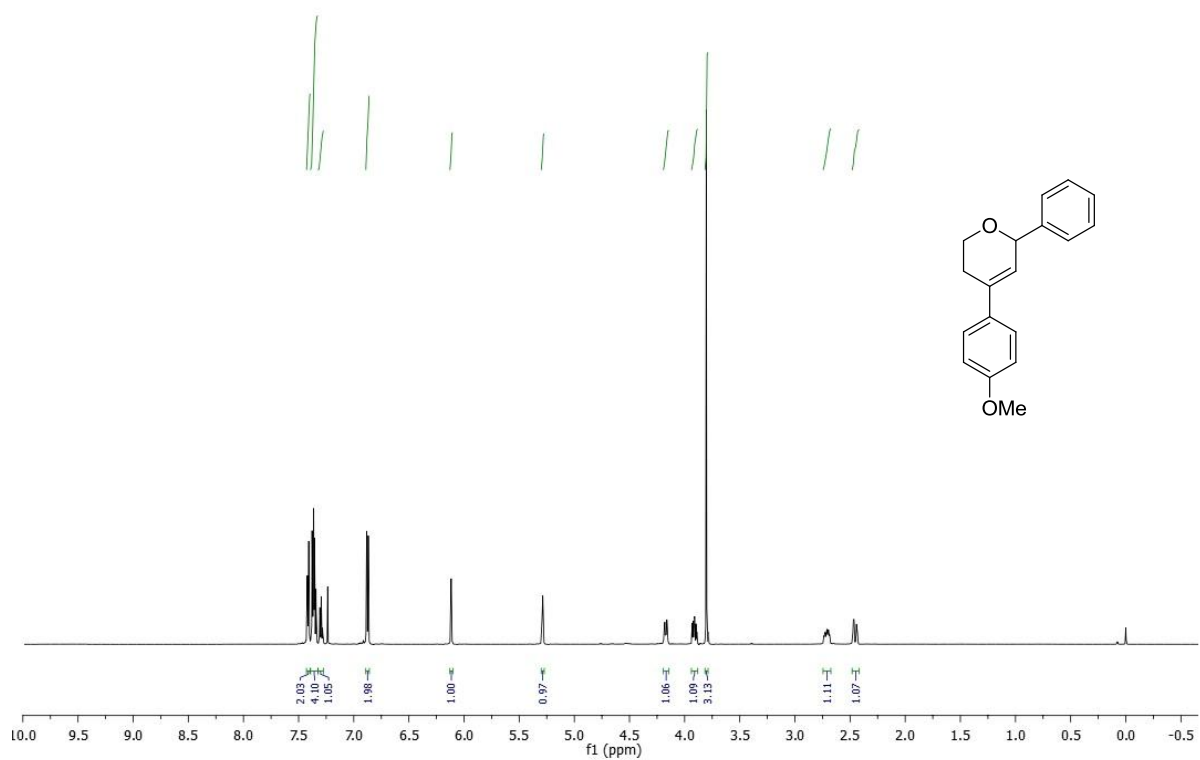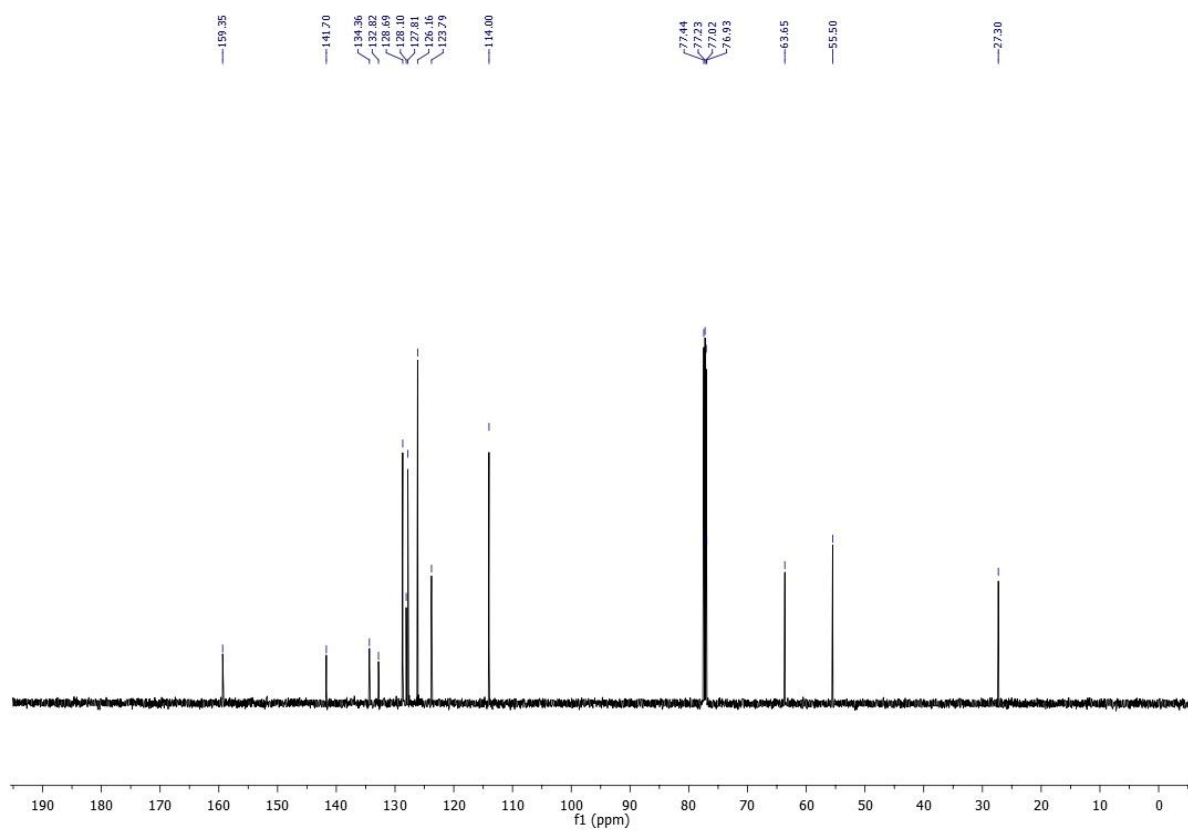

**$^1\text{H}$  NMR and  $^{13}\text{C}$  NMR spectra of compound 8f**

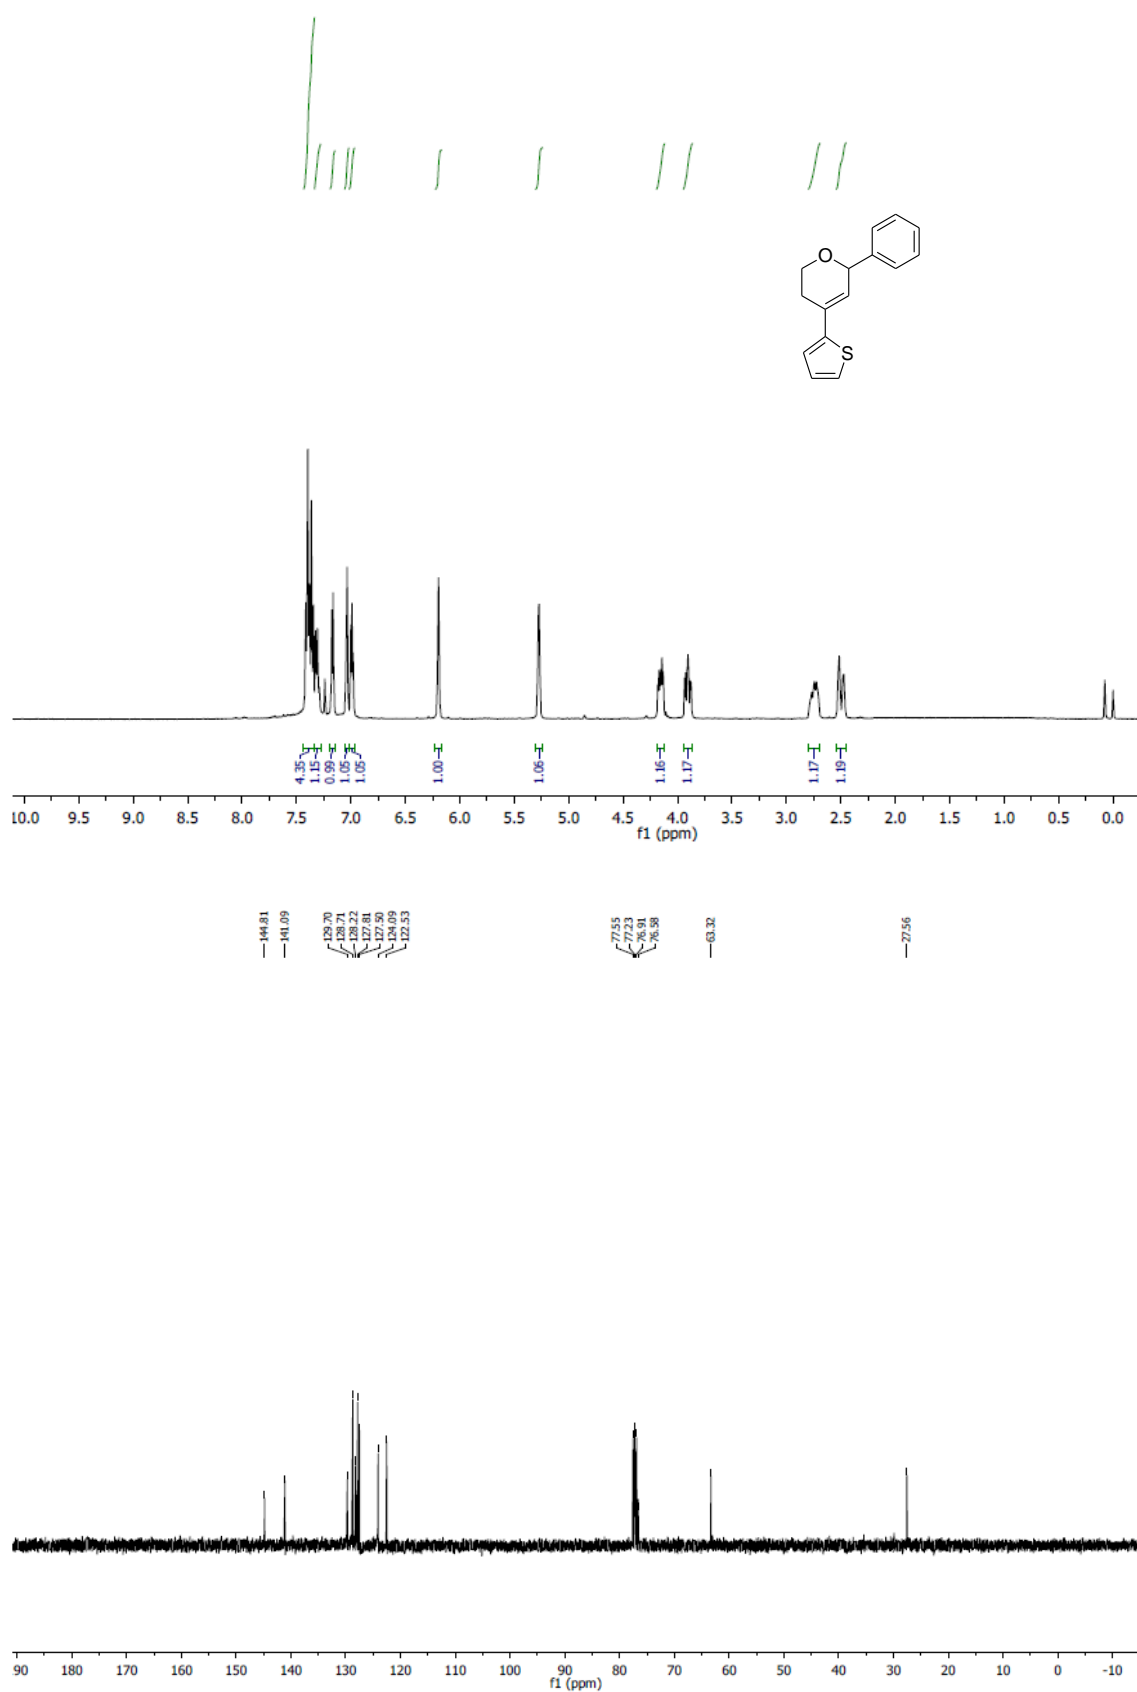

# <sup>1</sup>H NMR and <sup>13</sup>C NMR spectra of compound 9

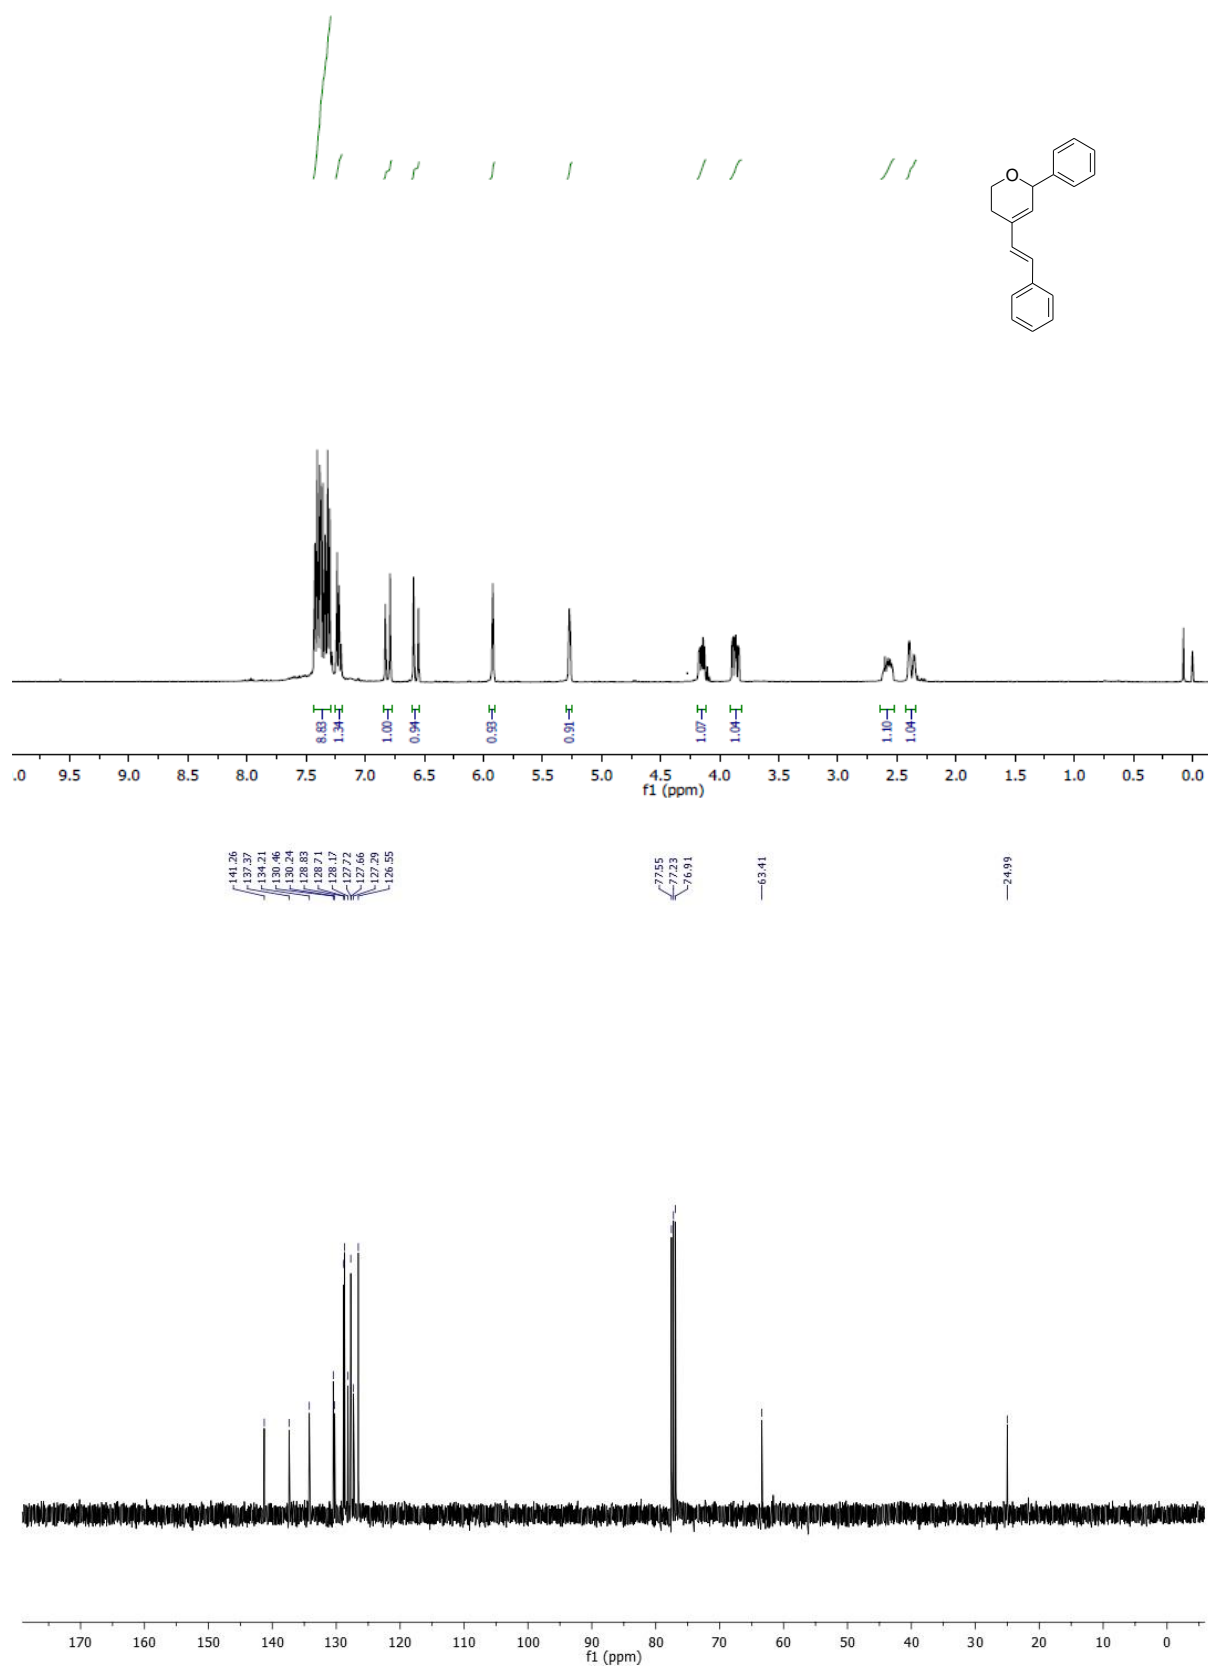



**$^1\text{H}$  NMR and  $^{13}\text{C}$  NMR spectra of compound 10**

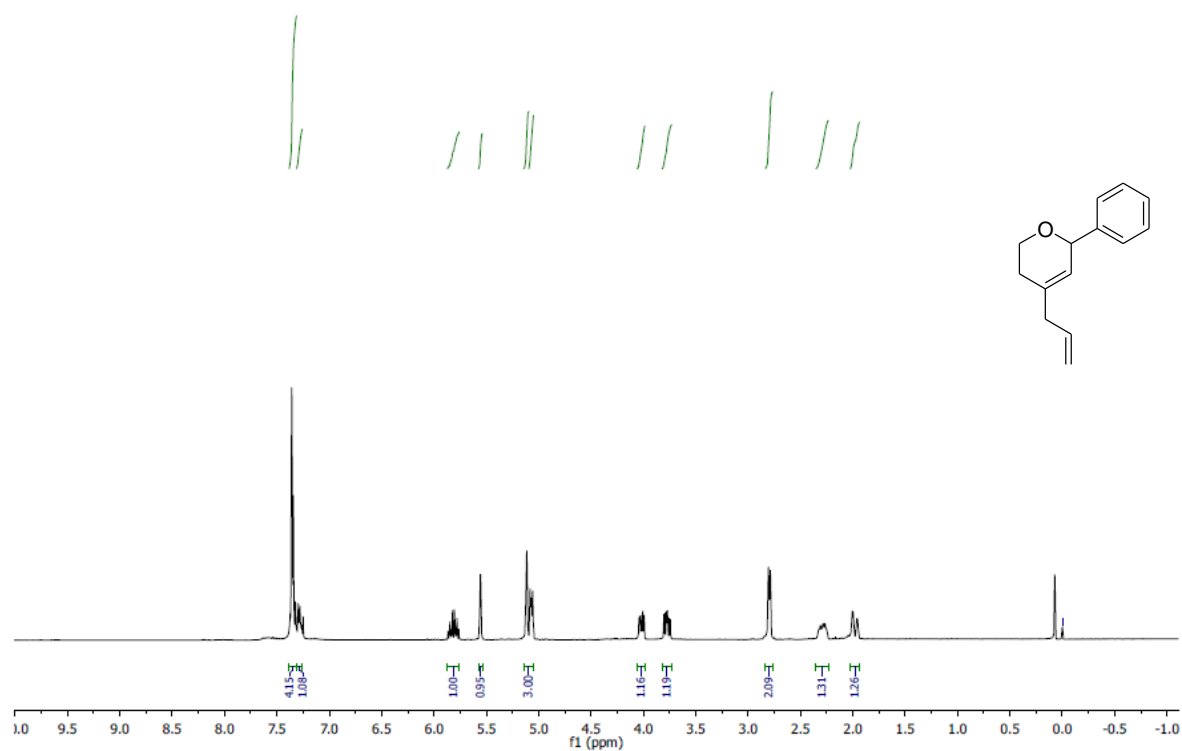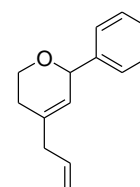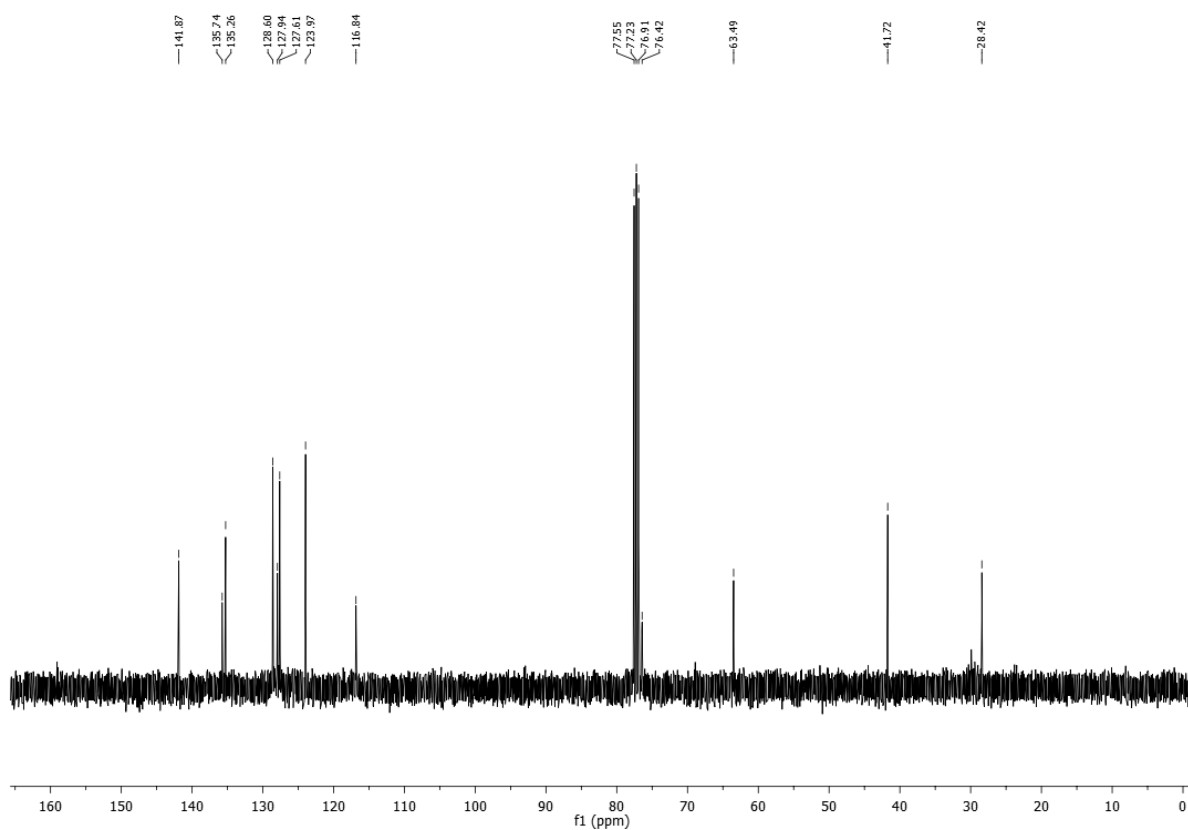

**$^1\text{H}$  NMR and  $^{13}\text{C}$  NMR spectra of compound 11**

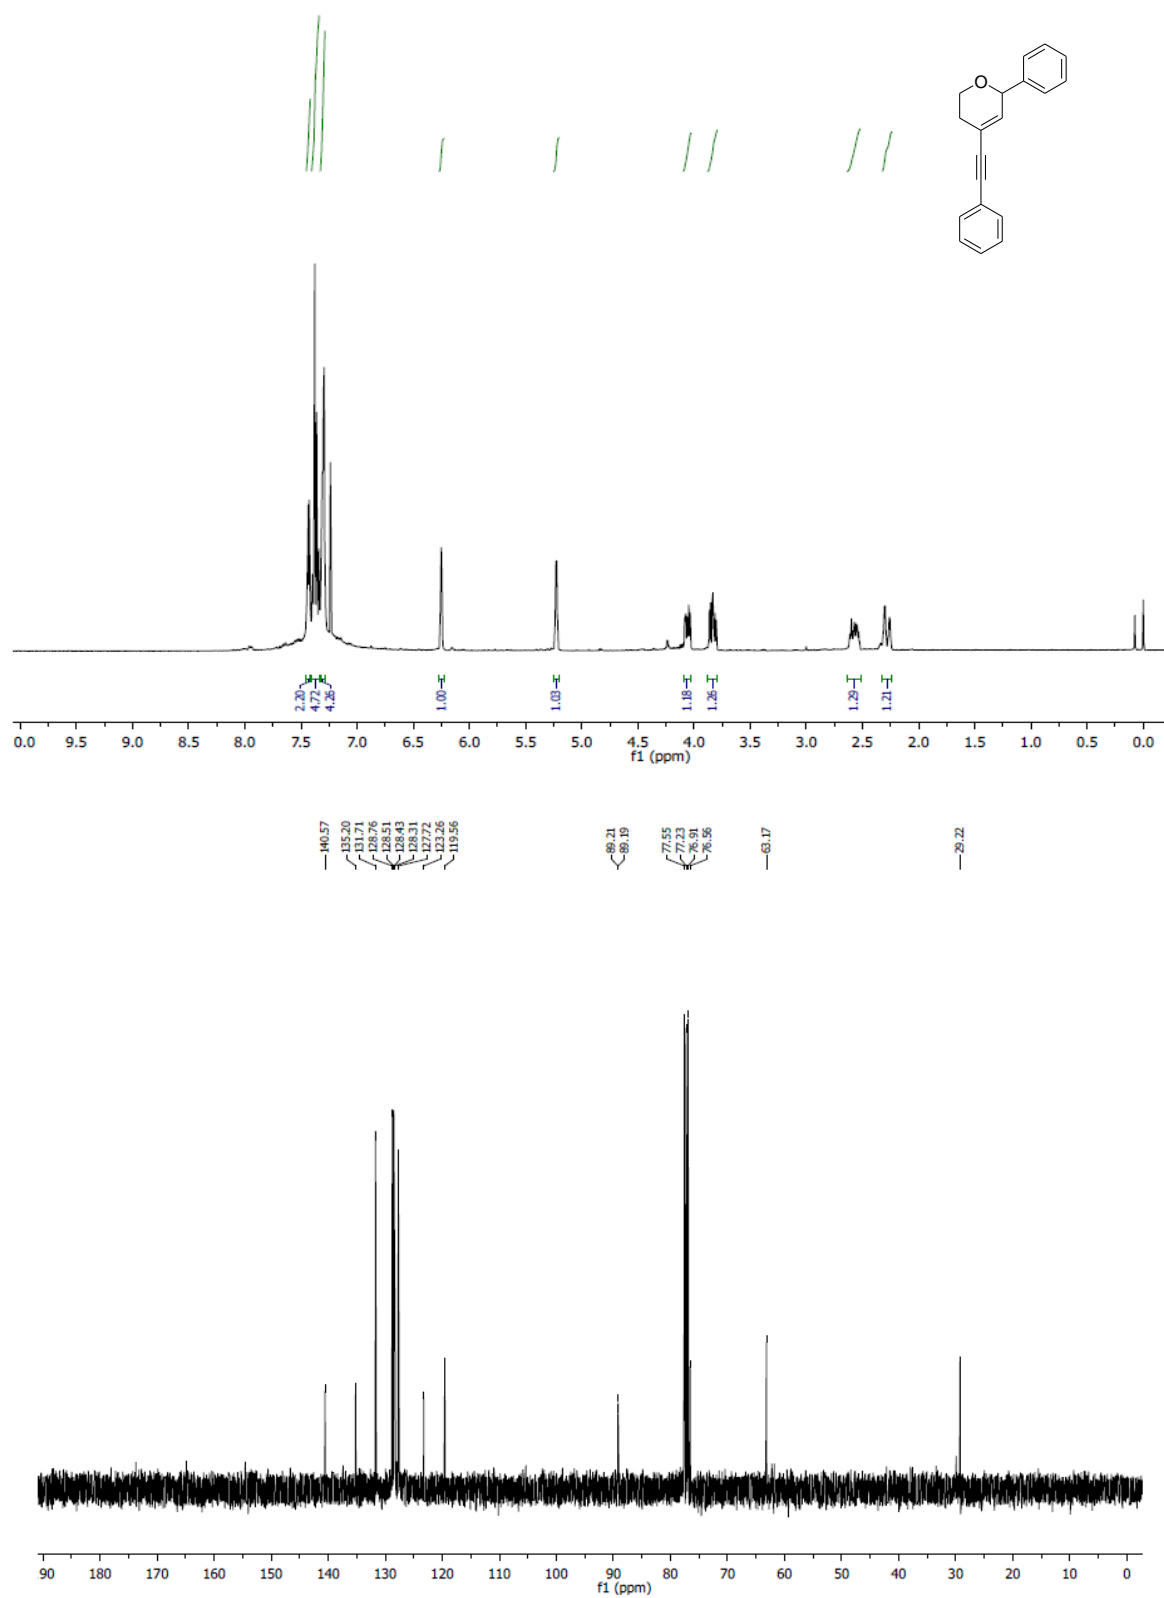

The crystal parameters of compound **3n**

|                                                     |                                                                 |
|-----------------------------------------------------|-----------------------------------------------------------------|
|                                                     | CCDC 1433323                                                    |
| Formula                                             | C <sub>16</sub> H <sub>13</sub> F <sub>3</sub> O <sub>4</sub> S |
| Formula weight                                      | 358.32                                                          |
| <i>T</i> /K                                         | 296(2)                                                          |
| Crystal system                                      | Monoclinic                                                      |
| Space group                                         | P21                                                             |
| <i>a</i> /Å                                         | 5.8732(3)                                                       |
| <i>b</i> /Å                                         | 8.2240(4)                                                       |
| <i>c</i> /Å                                         | 33.7553(17)                                                     |
| $\alpha$ /°                                         | 90.00                                                           |
| $\beta$ /°                                          | 94.151(3)                                                       |
| $\gamma$ /°                                         | 90.00                                                           |
| <i>V</i> /Å <sup>3</sup>                            | 1626.14(14)                                                     |
| <i>Z</i>                                            | 4                                                               |
| Abs. Coeff./mm <sup>-1</sup>                        | 0.248                                                           |
| Abs. Correction                                     | multi-scan                                                      |
| GOF on <i>F</i> <sup>2</sup>                        | 1.041                                                           |
| Final <i>R</i> indices [ <i>I</i> > 2σ( <i>I</i> )] | <i>R</i> 1 = 0.1452<br><i>wR</i> 2 = 0.2197                     |
| <i>R</i> indices [all data]                         | <i>R</i> 1 = 0.2008<br><i>wR</i> 2 = 0.2402                     |

ORTEP diagram of compound **3n** with 50% ellipsoid probability

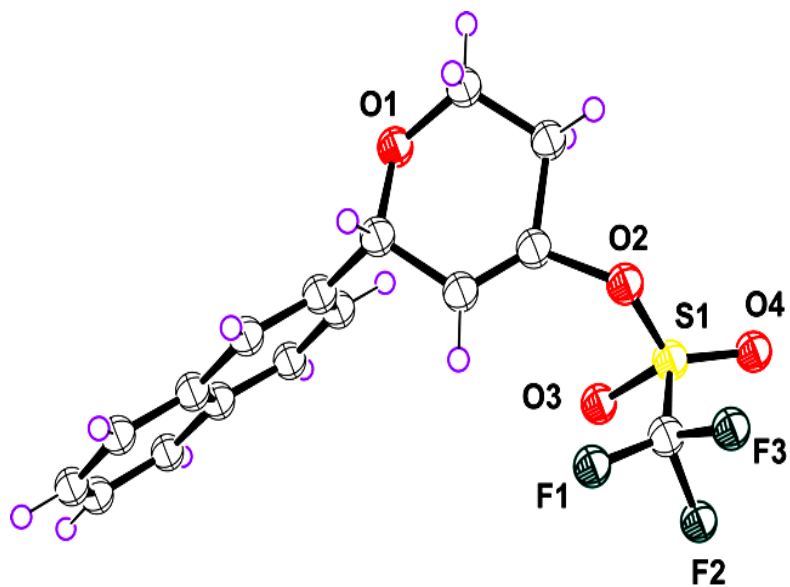

Supplement: c6ra02343f1.pdf [file c6ra02343f1.pdf]
